# 1 Pollen sequencing reveals barriers and aberrant patterns of recombination in 2 interspecific tomato hybrids 3

4 Roven Rommel Fuentes<sup>1</sup>, Ronald Nieuwenhuis<sup>2</sup>, Jihed Chouaref<sup>3,4</sup>, Thamara Hesselink<sup>2</sup>, Willem  
5 van Dooijeweert<sup>5</sup>, Hetty C. van den Broeck<sup>2</sup>, Elio Schijlen<sup>2</sup>, Paul Fransz<sup>3</sup>, Maike Stam<sup>3</sup>, Hans de  
6 Jong<sup>6</sup>, Sara Diaz Trivino<sup>2</sup>, Dick de Ridder<sup>1</sup>, Aalt D.J. van Dijk<sup>1</sup>, Sander A. Peters<sup>2,\*</sup>  
7

8 <sup>1</sup>Bioinformatics Group, Wageningen University and Research, 6708 PB Wageningen, The Netherlands

9 <sup>2</sup>Business Unit of Bioscience, Cluster Applied Bioinformatics, Wageningen University and Research,  
10 6708 PB Wageningen, The Netherlands

11 <sup>3</sup>Swammerdam Institute for Life Sciences, University of Amsterdam, 1098 XH Amsterdam, The Netherlands

12 <sup>4</sup>Department of Human Genetics, Leiden University Medical Center, Leiden, The Netherlands

13 <sup>5</sup>Centre for Genetic Resources, Wageningen University and Research, 6708 PB Wageningen, The Netherlands

14 <sup>6</sup>Laboratory of Genetics, Wageningen University and Research, 6708 PB Wageningen, The Netherlands  
15

16 \*Corresponding author: [sander.peters@wur.nl](mailto:sander.peters@wur.nl)

## 17 **Abstract**

18 Tomato is the most consumed vegetable in the world. Increasing its natural resistance and resilience  
19 is key for ensuring food security within a changing climate. Plant breeders improve those traits by  
20 generating crosses of cultivated tomatoes with their wild relatives. Specific allele introgression  
21 relying on meiotic recombination, is hampered by structural divergence between parental genomes.  
22 However, previous studies of interspecific tomato hybridization focused in single cross or lacked  
23 resolution due to prohibitive sequencing costs of large segregating populations. Here, we used  
24 pooled-pollen sequencing to reveal unprecedented details of recombination patterns in five  
25 interspecific tomato hybrids. We detected hybrid-specific recombination coldspots that underscore  
26 the influence of structural divergence in shaping recombination landscape. Crossover regions and  
27 coldspots show strong association with specific TE superfamilies exhibiting differentially accessible  
28 chromatin between somatic and meiotic cells. We also found gene complexes associated with  
29 metabolic processes, stress resistance and domestication syndrome traits, revealing undesired  
30 consequences of recombination suppression to phenotypes. Finally, we demonstrate that by using  
31 resequencing data of wild and domesticated tomato populations, we can screen for alternative  
32 parental genomes to overcome recombination barriers. Overall, our results will allow breeders  
33 better informed decisions on generating disease-resistant and climate-resilient tomato.

## 34 Introduction

35 Crop breeding relies on the availability of genetic diversity to generate novel allele combinations  
36 that are agronomically valuable. However, long term selection by inbreeding often causes loss of  
37 essential allelic information. To reintroduce lost genetic variation, breeders have introgressed alien  
38 chromatin by crossing crops with wild relatives followed by repeated backcrossing and selection.  
39 Among the most desirable traits to be incorporated into the breeding material are abiotic stress and  
40 disease resistance, higher yield, and fruit quality <sup>1</sup>. The success of introgression breeding largely  
41 depends on the process of recombination to introduce genetic material from the donor to the  
42 recipient crop. Meiotic recombination generates genetic diversity, but may also break apart co-  
43 adapted allele combinations, resulting in fitness reduction <sup>2</sup>. Moreover, low frequency or complete  
44 absence of recombination in a genomic region leads to linkage drag and limits the ability of  
45 breeders to develop novel allele combinations. Chromosome regions where recombination is  
46 suppressed are found in pericentromeres, including retrotransposons and other DNA-methylated  
47 regions <sup>3,4</sup>. Furthermore, heterozygous structural variants (SVs) have been reported to limit pairing  
48 and crossovers (COs) or lead to lethal gametes, suggesting that genomic rearrangements affect  
49 recombination patterns, especially in hybrids <sup>5-8</sup>.

50 Genomic rearrangements may exist between related species and different genotypes of the  
51 same species. Characterization of these rearrangements have revealed recombination coldspots,  
52 some of which are associated with resistance genes or adaptive traits <sup>9,10</sup>. Due to absent or  
53 diminished COs in SV regions, clusters of tightly linked alleles known as supergenes are inherited  
54 together, contributing to local adaptation and reproductive isolation <sup>11-13</sup>. Suppression or absence of  
55 recombination has been found essential in speciation and domestication by allowing the fixation of  
56 alleles such as those within selective sweeps <sup>14,15</sup>. One of the best studied rearrangements in plants  
57 is the 1.17Mb paracentric inversion in *Arabidopsis*, which shows complete lack of recombination in  
58 the rearranged genomic segment linked with fecundity under drought <sup>16</sup>. It was reported that  
59 recombination is prevented by SVs in genomic regions causing self-incompatibility in Brassicaceae  
60 plants <sup>17</sup> and reproductive isolation in monkeyflower <sup>18</sup>. In the backcross descendants of a *Solanum*  
61 *habrochaites* introgression into cultivated tomato (*S. lycopersicum*), an inversion containing the *Ty-2*  
62 resistance genes and at least 35 more genes causes linkage drag, unabling selection of appropriate  
63 agronomic trait combinations in the offspring <sup>19,20</sup>. Another example is the lack of CO in the inverted  
64 region of a *S. esculentum* x *S. peruvianum*, containing the nematode-resistance gene, *Mi-1*, and  
65 other genes conferring resistance to different pathogens and insects <sup>5</sup>.

66           Although previous studies addressed the role of SVs as recombination barriers in a limited  
67 number of genomic regions, a genome-wide analysis of decreased or absent COs related to SVs in  
68 tomato and multiple hybrid crosses is currently lacking, due to the absence of cost-effective and  
69 high-resolution crossover detection methods and accurate SV prediction. The effect of structural  
70 differences on chromosome pairing during meiosis has been studied using electron microscopy <sup>21</sup>,  
71 comparing spreads of synaptonemal complexes (SCs) from multiple F1 tomato hybrids. Moreover,  
72 the synaptic configurations revealed mismatched kinetochores, inversion loops and translocation  
73 complexes, pointing to structural differences in the parental genomes that likely influence the  
74 recombination landscape. However, their electron microscopic studies could not reveal the  
75 consequences of erratic recombination patterns between the parental partners. To analyze these  
76 patterns in higher resolution, Demirci, et al. <sup>22</sup> sequenced F<sub>6</sub> recombinant inbred lines obtained from  
77 a cross between tomato (*S. lycopersicum*) and its wild relative *S. pimpinellifolium*, and  
78 computationally detected recombination sites. We subsequently developed a less laborious and  
79 costly method, involving pollen profiling. Using a pool of pollen from *S. pimpinellifolium* x *S.*  
80 *lycopersicum* F1 hybrids, we generated a recombination landscape at nucleotide resolution level <sup>23</sup>,  
81 revealing significant reduction of COs in heterozygous deletions <sup>15</sup>.

82           To better understand occurrence and frequencies of CO events, we profiled here the  
83 recombination landscape in multiple crosses of tomato and wild relatives by sequencing pools of  
84 pollen gametes. We identified CO coldspots in each hybrid cross and examined recombination  
85 patterns and barriers. Our results suggest a major role for SVs and transposable elements in shaping  
86 the recombination landscape in hybrids, specifically in suppressing COs in gene complexes that  
87 relate to adaptation, speciation, and domestication. In addition, we present an example of syntenic  
88 and non-syntenic accessions for specific genomic regions, which may be considered in the selection  
89 of parental breeding lines as so called ‘bridge accessions’ to avoid or overcome introgression  
90 bottlenecks.

## 91 92 **Results**

### 93 *Crossovers in multiple hybrid crosses*

94 In this study, we have generated hybrid crosses of *S. lycopersicum* Heinz1706 and its wild relatives *S.*  
95 *pimpinellifolium* (CGN14498; **PM**), *S. neorickii* (LA0735; **NE**), *S. chmielewskii* (LA2663; **CH**), *S.*  
96 *habrochaites* (LYC4; **HB**), and *S. pennelli* (LA0716; **PN**). Hereafter, we use these abbreviations and the  
97 species name when referring to the hybrids and the parental genome, respectively. The pool of  
98 pollen from each hybrid was sequenced using 10X Genomics kits (**Supplementary Table 1**) based on  
99 the protocol described in Fuentes, et al. <sup>23</sup>. To detect crossover events (COs), we first profiled single-  
100 nucleotide polymorphism (SNP) markers. We then filtered out regions prone to false positive COs,

101 manifested by a high density of heterozygous SNPs and excessive sequence coverage  
102 (**Supplementary Figure 1**). *S. pennellii* and *S. pimpinellifolium* were the most distant and closest  
103 species to *S. lycopersicum* in this study and has the highest and lowest number of SNPs with respect  
104 to the reference genome (*S. lycopersicum*; SL4.0), respectively (**Table 1**). Using the filtered SNPs, we  
105 were able to detect haplotype shifts, leading to identification of putative recombinant haplotypes.  
106 These were further screened as described in the Methods (**Supplementary Figure 2**).

107 We detected a total of 6,382 COs in all hybrids, mostly located in distal segments of  
108 chromosomes, which is consistent with previous reports in tomato and other plant species<sup>3,8</sup>. For  
109 each hybrid, COs are confined to 6-12% and below 1% of the distal euchromatin (DEU) and  
110 pericentric heterochromatin (PCH), respectively, and in total CO regions account for only 2% of the  
111 whole genome, consistent with other eukaryotic organisms where recombinations are concentrated  
112 in hotspots<sup>3,8,24,25</sup>. Although PCH regions of tomato are known to exhibit low recombination rates  
113<sup>26,27</sup>, we detected there a total of 710 COs (11.1%) from all hybrids, which most likely locate in  
114 euchromatin island in PCH. It was proposed that suppression of double-strand-breaks (DSBs), the  
115 precursor of COs, by heterochromatin on repetitive DNA helps safeguard against genome  
116 destabilization<sup>27,28</sup>.

117 We validated the resulting recombination profile of PM by comparison to existing CO data.  
118 The COs in the pollen gametes significantly overlap with COs previously detected in a RIL population  
119 of the same parental cross (Fisher's exact test;  $P = 5.8 \times 10^{-18}$ )<sup>22</sup>. More in detail, the frequency of COs  
120 in sliding genomic windows in DEU or in PCH also revealed a significant correlation between the  
121 recombination landscapes generated from pollen and the RIL population sequence data (Spearman's  
122 rank correlation; distal euchromatin,  $\rho = 0.33$ ;  $P < 2.2 \times 10^{-16}$ ; pericentric heterochromatin,  $\rho = 0.22$ ;  
123  $P < 2.2 \times 10^{-16}$ ). Furthermore, comparison with historical recombination hotspots detected in natural  
124 populations of wild and domesticated tomato<sup>15</sup> revealed that the COs in hybrids overlap with 294  
125 (Fisher's exact test;  $P = 2.0 \times 10^{-13}$ ) and 36 (Fisher's exact test;  $P = 3.8 \times 10^{-11}$ ) historical hotspots in  
126 DEU and PCH, respectively. Previous observations and our results both confirm recombination sites  
127 in PCH, which thus far were rarely observed due to their low frequency and the limitations of other  
128 CO-detection methods.

129 The vast majority (5,150) of COs are located within genes and their 1kb flanking regions,  
130 while another 471 are positioned between 1kb and 3kb from genes (**Table 1**; **Figure 1a**;  
131 **Supplementary Figure 3**). PM and NE have the lowest CO resolution, defined as the inverse of the  
132 distance between the SNP markers bounding the CO region (resolution =  $1/\text{distance}$ ). We consider a  
133 detected CO as high resolution if the distance between the markers flanking the CO region is below  
134 1kb, *i.e.* if the resolution is above 0.001. The number of COs near or within genes, in both DEU and

135 PCH regions, is significantly higher than expected by chance (**Table 1**). Although genic regions  
136 account for only 15.5% of tomato genome, majority of the CO regions overlap gene features (**Figure**  
137 **1a**). *S. pimpinellifolium* COs apparently overlap more with intergenic regions than COs in other  
138 hybrids. One possible confounding factor could be that *S. pimpinellifolium* has fewer SNPs than the  
139 other species (**Table 1**), which may lead to a lower resolution of detected COs. To determine if this  
140 contributed to the higher overlap between gene features and COs in PM, COs with similarly  
141 distributed resolution for all hybrids were separately analyzed (**Supplementary Figure 4A**). However,  
142 the result still shows the same higher intergenic overlap of crossover events in PM (**Supplementary**  
143 **Figure 4B**), which is unexpected and enigmatic.

144         Aside from association with genes, sequence motifs are discovered in CO regions too <sup>22,29,30</sup>.  
145 Using high resolution COs, we found that CTT-like repeats, poly-AT and A-rich motifs are actually  
146 enriched in regions flanking rather than within COs (**Supplementary Figure 5**). These CO motifs have  
147 been previously identified in other plant species but due to low resolution, it was not possible to  
148 determine whether they were actually located within or just near CO regions. However, their close  
149 proximity to crossover sites hints that they may have a role in recruiting recombination-promoting  
150 factors as previously proposed <sup>31</sup>.

151

#### 152 *Unique recombination patterns between hybrids*

153 All hybrids show similar recombination landscapes with COs mostly at distal, gene-rich chromosome  
154 regions. Yet, there are also unique, local patterns of COs shown in **Figure 1d**. Comparisons of  
155 recombination profiles from different hybrids are essential to learn about variability and genomic  
156 factors contributing to CO patterns. To examine similarities between hybrids, we first identified  
157 overlapping COs between hybrids and found a significantly higher fraction than expected by chance  
158 (**Figure 1b**). Among all pairs, the highest overlap of COs is observed between hybrids with wild  
159 parents that are evolutionarily closely related to each other (NE and CH or HB and PN). On the  
160 contrary, CO sites in PM have more overlap with PN than with other closely related species, which  
161 does not reflect their evolutionary distance (**Figure 1e**). A low but significant overlap has also been  
162 observed when comparing recombination hotspots in natural populations of wild and domesticated  
163 rice, cocoa and tomato <sup>15,32,33</sup>. About 35.3% (1,161) of CO regions, containing a total of 3,996  
164 crossover events, are shared by at least two hybrids. CO regions per hybrid cover around 2% of the  
165 genome, whereas they cover 10% (77.6 Mbp) when combined, apparently not extensively  
166 overlapping, thus indicating divergent CO regions between the hybrids.

167         Given the low rate of CO region overlap between hybrids, we decided to investigate whether  
168 the overall recombination landscape across the genome is significantly correlated between hybrids.

169 **Figure 1c** shows that NE and CH have the most similar landscape. The low CO overlap (4%; **Figure 1b**)  
170 between CH and HB does not translate to a low landscape correlation ( $r^2 = 0.64$ ); similarly, despite  
171 the high overlap between PM and PN COs (7%), the correlation coefficient of their landscapes is one  
172 of the lowest among all pairs ( $r^2 = 0.52$ ), consistent with their evolutionary distance. Although the  
173 number of overlapping COs is significant, it is far less than the non-overlapping COs that contribute  
174 more to shaping the overall recombination landscape. This result suggests that despite the similar  
175 overall landscape, the hybrids exhibit local differences in CO patterns.

176 As shown in the landscapes, the patterns of genomic regions without recombination in the  
177 hybrids differ. To analyze these patterns, we identified CO coldspots of more than 1Mb and found  
178 that they cover 72-79% of the genomes, with the highest coverage in HB and PN. Grouping by  
179 genomic position and size, we assigned coldspots into 325 *unique* and 101 *shared* clusters (**Figure**  
180 **1f**), with 63.6% of the genome (6.4Mb euchromatic; 485Mb heterochromatic) lacking CO in all five  
181 hybrids, which we refer to here as *conserved* coldspots. PM has significantly shorter coldspots than  
182 the other hybrids (pairwise Wilcoxon rank-sum test;  $P < 1.4 \times 10^{-2}$ ) and a large number of unique  
183 coldspot regions. This divergent patterns of CO region and coldspot, confirms that hybridization of  
184 tomato with different wild parents results to variable recombination bottlenecks, uncovering the  
185 additional complexity in breeding.

186

#### 187 *Absence of COs in structural variant heterozygosity*

188 With the results above indicating clear variation in the occurrence of COs in the different hybrids, we  
189 speculated that large genomic rearrangements between species may underlie the varying patterns  
190 of recombination. To investigate this, we detected SVs between the parental species *S. lycopersicum*  
191 and the wild relatives. Furthermore, given that heterozygous SVs may exist in the wild species  
192 genomes, allowing the F1 hybrid to inherit an allele that is similar to the reference genome, we also  
193 genotyped SVs in the F1 hybrid pollen sequences and retained only the heterozygous ones (**Figure**  
194 **2a**). Combining all parental wild species genomes, we detected 59,265 SVs with size above 50bp. We  
195 found more deletions than inversions, which may be due to either the inherently low frequency of  
196 large inversions<sup>34</sup> or the difficulty of detecting inversions compared to deletions (**Figure 2b**). Among  
197 the wild genomes, HB and PN have the highest number of SVs, which are also significantly longer  
198 compared to the other parental genomes (**Supplementary Figure 6**). To check the accuracy of the  
199 filtered SV set, we manually verified SVs from *S. pennellii* using dot plots between *S. lycopersicum*  
200 and *S. pennellii* assemblies (**Supplementary Figure 7**). 88% of 50 randomly selected deletions are  
201 supported, while an additional 10% belong to more complex translocation events and the remaining  
202 2% are false positives. For inversions, we found 76.7% true positives.

203 To further examine the relationship between SVs and recombination landscapes, we  
204 identified rearrangements and syntenic regions between *S. lycopersicum* and *S. pennellii* assemblies  
205 and compared them against PN COs. We found that 94% of PN COs are in syntenic segments at distal  
206 chromosomal regions (Fisher's exact test;  $P < 0.001$ ; **Supplementary Figure 8**), which correspond to  
207 the essential role of synteny in synapsis and crossing-over of homeologous chromosomes during  
208 meiosis<sup>10,35</sup>. Using a permutation test, we indeed found strong reduction of recombination in SVs  
209 across all hybrids, specifically for SVs larger than 1kb (**Figure 2h**). Further analyses will only use SV  
210 larger than 1kb (**Supplementary Figure 9**). About 62-74% of SVs in the wild genomes overlap with  
211 coldspots, which may relate with the absence of recombination. Most SVs are located a few to tens  
212 of kilobases away from COs (**Figure 2f**), similar to *A. thaliana*<sup>6</sup>, but SV size is not correlated to its  
213 distance from the CO site (**Supplementary Figure 10**).

214 Given that DEU and PCH in tomato have distinct genomic features, we examined their SV  
215 composition and found more SVs in DEU than in PCH regions, with an average ratio of 1.55 to 1. This  
216 agrees with the previous observations that wild and domesticated tomato accessions have higher SV  
217 density in DEU than in PCH<sup>34,36</sup>. In addition, SVs in PCH are on average longer than those in DEU  
218 (Wilcoxon rank-sum test;  $P < 5.8 \times 10^{-16}$ ; **Supplementary Figure 11**). We also observed that in PCH,  
219 higher genome coverage by SV regions comes with lower coverage by CO regions (**Figure 2c**). PM has  
220 the largest total number of CO regions in PCH, while PN has the largest number. As these PM COs  
221 overlap with the SVs in the other wild genomes, we argued that the higher SV content in other wild  
222 genomes leaves less sites for recombination in hybrids. Given that there are other complex  
223 rearrangements and SV types that we cannot detect with our data, it is likely that more divergent CO  
224 sites are defined by the presence or absence of SVs.

225 We identified large parts of the DEU in PN with prominent spots without CO. To validate  
226 whether these represent real coldspots, we compared them against the recombination coldspots in  
227 the EXPEN2012 linkage map<sup>37</sup>. First, we identified large DEU coldspot regions in the linkage map by  
228 mapping the EXPEN2012 markers against the tomato reference genome, retrieving the physical  
229 position and subsequently plotting against the genetic position (**Figure 2e**). Then, we compared the  
230 EXPEN2012 coldspot against the PN coldspots. Large coldspots are observed in some chromosomes,  
231 spanning 0.14 to 7.64 Mb, and they match the coldspots we found in PN, demonstrating the  
232 accuracy of our method. Unlike the course-grained genetic map, the fine-scale recombination profile  
233 we generated allows comparison with genome features, aiding the elucidation of factors influencing  
234 recombination landscape.

235 Further inspection of these large PN coldspots revealed that they have significantly lower  
236 levels of synteny compared to non-coldspots (**Figure 2g**). These coldspots, however, may be specific



237 to PN or may not fully overlap coldspots in other hybrids, as we have found 518 COs in the other  
238 hybrids. Among the PN coldspots, we found that at least two, specifically in the short arm of  
239 chromosomes 6 and 7, contain large inversions relative to the reference genome as previously  
240 validated using BAC-FISH<sup>9</sup>. They may also correspond to the inversion loops found at the distal  
241 chromosome ends and in the euchromatin-heterochromatin borders<sup>21</sup>. We were able to identify the  
242 exact location of an inversion in chromosome 7 (**Figure 2d**) by comparing genome assemblies and  
243 inspecting linked reads (**Supplementary Figure 12**). Aside from the inversion, this 2.4 Mbp coldspot  
244 region also contains other rearrangements like translocations that could inhibit proper synapsis and  
245 recombination. Upon examining the other large coldspots, we similarly found complex  
246 rearrangements and large insertions and deletions. Across all hybrids, our results suggest that SVs  
247 contributed significantly to shaping the recombination patterns by inhibiting COs, which may have  
248 been vital in the fixation of specific alleles during domestication<sup>15,38</sup>. Importantly, the SVs that have  
249 been implicated with domestication of tomato can cause heterozygosity during hybridization with  
250 wild relatives which consequently suppress recombination.

251

#### 252 *Widespread coldspots in TE regions*

253 Aside from SVs, studies on other species also linked the presence of transposable elements (TEs)  
254 with CO incidence, specifically retrotransposons with COs suppression<sup>4</sup>. In tomato hybrids, most  
255 retrotransposons (Class I), except SINEs and RTE-BovBs, indeed show suppression of COs (**Figure 3a**).  
256 However, *Stowaway* and *Tip100* (Class II), simple repeats and low complexity regions are enriched  
257 with COs. TEs associated with CO suppression are densely distributed in the PCH, whereas *Stowaway*  
258 and *Tip100* are located mostly in the DEU (**Figure 3c**). Similarly, this association with TE superfamilies  
259 was reported in historical recombination hotspots of wild and domesticated populations of tomato  
260<sup>15</sup>. As shown in **Figure 3b**, the presence of retrotransposons such as *Gypsy*, *Copia* and *L1* in a  
261 genomic region correlates with crossover suppression, consistent with the reports in many other  
262 species<sup>31,32,39-42</sup>. In contrast *Stowaway* and *Tip100* show positive correlation with crossover  
263 incidence (**Supplementary Figure 13**).

264 The enrichment of COs correlates with lower nucleosome occupancy and reduced DNA  
265 methylation<sup>31</sup>. To investigate the chromatin state of TE elements with and without COs, we  
266 performed an ATAC-seq analysis of *S. lycopersicum* meiotic and somatic cells and found 52,802 and  
267 25,101 accessible chromatin regions (ACRs), respectively. These ACRs have an average size of 733bp  
268 and represent accessible chromatin in the *S. lycopersicum* parent. We performed Pearson  
269 correlation analysis of the read distribution over the genome which showed high similarity between  
270 biological replicates (**Supplementary Figure 14**). Based on a permutation test, we found significant



271 overlap between COs and meiotic ACRs (z-score = 87.2), confirming the reports that COs occur in  
272 regions accessible to recombination machinery. In **Figure 3e**, we can see that crossover regions have  
273 higher ACR coverage compared to random genomic regions. Upon comparing meiocyte ACRs with  
274 TEs, we found that TE superfamilies enriched with COs have an accessible chromatin segments,  
275 whereas retrotransposons like *Gypsy*, *Copia* and *L1* are not associated with accessible chromatin  
276 (**Figure 3d**). This is similar to the reports in *A. thaliana* of DNA transposons showing nucleosome  
277 depletion and higher SPO11-1-oligo levels<sup>31</sup>. Moreover, retroelements like *Gypsy*, *Copia* and *L1* have  
278 very few SPO11-1-oligos, and high DNA methylation and nucleosome occupancy. This association of  
279 CO with specific class I and class II TEs is also observable in the landscape in **Figure 3c**, where the  
280 former are densely distributed in the PCH while the latter are predominantly found in DEU.  
281 Furthermore, the chromatin accessibility of TE superfamilies flips between the somatic and meiotic  
282 cells, hinting at a preference of keeping specific superfamilies inaccessible during meiosis (**Figure**  
283 **3d**). The differential ACRs suggests that TE superfamilies may have different roles or activities  
284 between tissue types and in relation to recombination. Our results emphasize the major role of  
285 chromatin structure in the suppression or enrichment of COs in TEs and the need to particularly  
286 analyze meiocytes to account for tissue-specific ACRs.

287 Similar to the association of COs with proximal promoter regions<sup>23</sup>, it was previously  
288 reported that ACRs are strongly associated with transcription start site (TSS)<sup>43</sup>. To confirm it, we  
289 examined the average profile of ATAC-seq signal in genes and their flanking regions, and found the  
290 highest coverage at TSS for both meiotic and somatic cells (**Supplementary Figure 15**). We also  
291 checked percentage of ACRs in genome features and discovered that the majority are located near  
292 or within genes (**Figure 3f**), similar to COs (**Figure 1a**). Normalized by the total genome coverage of  
293 the feature, the promoter regions and the UTRs (untranslated regions) have the highest ACR density.

294 Aside from the fact that many SVs are generated by *Gypsy* and *Copia* retrotransposons<sup>34</sup>,  
295 67% of coldspots we detected are covered by these TE elements for at least 50%. About 98.6% of the  
296 conserved coldspots are in PCH where retrotransposon presence is dense<sup>31</sup>. Furthermore, the  
297 retrotransposon families that are linked with CO suppression, cover 450Mb (~52%) of the tomato  
298 genome, implying the wide span of suppression due to retrotransposons. This underscores the  
299 importance of transposable elements in shaping recombination patterns, both in hybrids and  
300 inbreeding materials and predominantly in regions with high retrotransposon density.

301

### 302 *Supergenes and breeding bottlenecks*

303 COs tend to occur near genes but certain genomic elements prohibit the recombination between  
304 loci, causing co-segregation of these loci to the offspring. About 62% of genes are in CO coldspots of

305 one or more of the hybrids and 484 of these coldspots contain at least 20 genes (**Figure 4a**). Gene  
306 complexes within coldspots are supergenes in a specific hybrid, but the same supergenes are not  
307 necessarily found in other hybrid tomato crosses. Although many supergenes are located in the  
308 conserved coldspots in PCH, other supergenes are located in the 81 coldspots in gene-dense DEU. In  
309 a gene ontology (GO) enrichment analysis of crossover and coldspot regions (**Figure 4b**), we found  
310 that 45 biological processes, 14 molecular functions, and 48 cellular components are significantly  
311 enriched (false discovery rate < 0.05) and that overrepresented GO terms in coldspots are associated  
312 with basal housekeeping functions (e.g like transcription coregulator activity, transporter complex,  
313 rRNA processing, metabolic processes). A more detailed list of enriched GO terms is reported in  
314 **Supplementary Figure 16**. Interestingly, we identified multiple metabolic processes enriched in the  
315 coldspots (**Supplementary Figure 16a**), which may reflect the evolutionary divergence between the  
316 tomato and wild parents. Many of the coldspot genes are directly related to modification in  
317 metabolism, which is considered a prominent manifestation of the domestication process <sup>44-47</sup>.  
318 Supergenes, which are mostly generated by inversions or translocations, have actually been linked to  
319 metabolic pathways and alternative phenotypes in plants <sup>11,45</sup>.

320 To further investigate links between coldspots and phenotypes, we characterized the  
321 supergenes residing in the large coldspots in PN (**Figure 2e**). These coldspots contain 2,736 genes,  
322 877 of which have been identified as domestication syndrome genes <sup>48</sup>. The coldspots in the short  
323 arms of chromosome 6 and 7, coinciding with the inversion as previously reported by Szinay, et al. <sup>9</sup>,  
324 contain 130 and 295 genes, respectively, and are associated with responses to oxidative stress ( $P =$   
325  $1.27 \times 10^{-4}$ ) and specific catabolic and metabolic processes ( $9.66 \times 10^{-8}$ ) (**Supplementary Figure 16**).  
326 Similarly, the coldspots in both arms of chromosome 1 contain genes involved in metabolic  
327 processes of organic substances ( $P = 2.26 \times 10^{-5}$ ) and transcription coregulator activity ( $P = 6.06 \times 10^{-$   
328  $5$ ). This result does not simply imply association between metabolic processes and coldspots, but it  
329 underlines the highly constrained metabolic profile in hybrids or in tomato introgressed with these  
330 coldspot regions.

331 Aside from the rewiring of the metabolome, we are interested in knowing if domestication is  
332 associated with linkage drag in regions containing resistance (*R*) genes. Upon inspecting the  
333 coldspots in PN, we found that they are enriched with *R* genes (Fisher's exact test;  $P = 5.1 \times 10^{-4}$ ) and  
334 at least 29 coldspots (23 clusters) contain *R*-gene hotspots (**Supplementary Figure 17**). The coldspot  
335 in chromosome 7 contains 295 genes, including *R* genes and *chitinase* genes. In this region, we found  
336 an enrichment of genes related to the *chitin catabolic process* ( $FDR = 1.49 \times 10^{-4}$ ), *chitin binding* ( $FDR =$   
337  $1.63 \times 10^{-4}$ ) and *chitinase activity* ( $FDR = 2.18 \times 10^{-2}$ ), which are involved in plant defense responses  
338 against pathogens <sup>49-51</sup>. Our findings is consistent with the observation in Arabidopsis, in which CO

339 coldspots with many SVs contain clusters of *R* genes<sup>52</sup>. Some *R*-gene hotspots can become CO  
340 hotspots to overcome new pathogens through rapid diversification. In contrast, *R* genes conferring  
341 resistance to pathogens with low genetic plasticity are located in CO coldspot, possibly maintained  
342 by the structural heterozygosity<sup>53,54</sup>. The association between resistance genes and some  
343 unfavorable alleles due to genetic linkage limits the introgression of resistance haplotypes into  
344 breeding lines. A specific case of linkage drag involving the resistance to *Fusarium* wilt race 3,  
345 reduced fruit size and increased sensitivity to bacterial spot, was broken by reducing the size of the  
346 introgression<sup>55</sup>. However, this shrinking of introgressed region is feasible only because it is not  
347 induced by an inversion or other CO-suppressing type of SV, unlike the *Ty-1* and *Ty-2* introgression  
348 which both are located within inversions<sup>20</sup>. Aside from *R* genes, the coldspot in chromosome 7 also  
349 contain the *SUN* locus, which is linked with variable fruit shape in the wild and cultivated tomato  
350<sup>56,57</sup>. The remaining coldspots in PN contain 17 genes with putative roles in fruit shape  
351 determination, further substantiating the association between coldspots and domestication  
352 syndrome traits<sup>58</sup>.

353 To break linkage drag in an SV region with no recombination, alternative crosses that do not  
354 result to coldspot is needed. For the coldspot in chromosome 7 of PN, the other wild relatives can  
355 serve as alternative parent as they all exhibit recombination in this region. Another example of  
356 region with no recombination is a 294-kb euchromatic inversion in the *fasciated* (*fas*) locus with  
357 breakpoints in the first intron of a YABBY transcription factor gene (*SIYABBY2b*) and 1 kb upstream of  
358 the *SICV3* start codon<sup>59-61</sup>. This inversion contains 41 genes, including 4 disease resistance genes,  
359 and knocks down YABBY, conferring a large fruit phenotype to domesticated tomato. Given the  
360 resequencing data for populations of wild and domesticated tomato, it might be possible to find  
361 “bridge accessions” or accessions without the allele causing heterozygosity. We therefore screened  
362 56 accessions of wild (*S. pimpinellifolium*; SP), 109 early-domesticated (*S. lycopersicum* var.  
363 *cerasiforme*; SLC) and 127 vintage tomato (*S. lycopersicum* var. *lycopersicum*; SLL) that were  
364 genotyped for the inversion, including the SNPs within the inversion. All SP and 96% (109) SLC  
365 accessions have non-inversion genotypes while half (64) of the SLL group have at least one inversion  
366 allele (**Figure 4c**), which may suggest that the inversion could have occurred during tomato  
367 domestication. This is consistent with the drastic reduction of nucleotide diversity in this region  
368 when comparing SLC/SLL with SP population<sup>48</sup>. Upon inventorying the inversion and non-inversion  
369 accessions, we compared the SNP profile within the inversion region and found distinct haplotypes  
370 of SP compared to the SLL accessions (**Figure 4d**). We subsequently identified at least 12 SLL  
371 accessions without the inversion and with larger fruit weight phenotype compared to SP<sup>48</sup>. These  
372 candidate bridge accessions may be crossed with SP accessions to overcome CO suppression in the

373 inversion region while maintaining genetic background that confers large fruit other than the *fas*  
374 inversion. Aside from this inversion, there are at least 236 additional non-overlapping SV sites in the  
375 population of SP and SLC/SLL that may be analyzed to predict recombination barriers, especially  
376 lineage-specific rearrangements. Most importantly, this SV profile may be used to select for bridge  
377 accessions to introgress genetic diversity into genetically eroded domains of crop tomato.

378

## 379 **Discussion**

380 COs are mostly distributed in the gene-rich DEU regions of each chromosome, consistent with  
381 previous reports <sup>22,23</sup>. The recombination landscape in one of the hybrid accurately matched a  
382 genetic linkage map, underscoring the importance of our method which provide high resolution CO  
383 with less cost and labor. Despite the similar overall CO landscape between hybrids, we discovered  
384 fine-scale differences in CO patterns and regions without recombination. CO coldspots have limited  
385 ability to reshuffle alleles between tomato and wild species, which hamper introgressive  
386 hybridization breeding and reduce efficiency of backcrossing. Although the majority of the coldspots  
387 are conserved between all hybrids, some coldspots are unique to a cross, which may serve as  
388 putative targets to break linkage drag or to study the underlying fitness advantage that necessitates  
389 the suppression of recombination. This is so far the most comprehensive profile of recombination in  
390 tomato hybrids and possibly even in plant species.

391         Across all hybrids, we found conspicuous absence of crossover events in SV regions,  
392 particularly in lineage-specific rearrangements. The varying patterns of recombination between the  
393 hybrids is associated with the rearrangements between the wild parental genomes, implying that SV  
394 profiles in F1 progeny may help distinguish regions that may or may not allow crossovers. Knowing  
395 these regions enables breeders to fine-tune introgression plan by inspecting recombination patterns  
396 in the loci of interest prior to the elaborate hybridization and screening processes. Although multiple  
397 studies have already reported the negative association between SV and COs, it is still not clear how  
398 SVs inhibit recombination. Rowan, et al. <sup>6</sup> proposed several possible explanations for the observed  
399 suppression of COs in heterozygous SVs, such as absence of a repair template, tendency to produce  
400 non-viable gametes, DNA methylation in the SV region, and blocking physical interaction in variant  
401 regions preventing proper synapsis. Furthermore, it has been reported that DSBs in inversion regions  
402 are preferentially resolved as noncrossover gene conversions and not as COs <sup>6,62,63</sup>. Although we  
403 have already found a association between CO and SV patterns, further studies must be conducted to  
404 improve the detection of SVs, specifically of the insertion and translocation type, for better  
405 recognition of the underlying causes of suppression in each coldspot.

406 Structurally heterozygous regions in the genome, that cause lack of recombinant haplotypes,  
407 have been linked to adaptive phenotypes and plant domestication and speciation <sup>11,12,15,38</sup>. An  
408 inversion, capturing two or more alleles adapted to an environment, prevents recombination and  
409 confers a selective advantage that subsequently promotes its spread in the population <sup>64</sup>. Based on  
410 visual examination of the synaptonemal complexes, it was suggested that SVs form interspecific  
411 reproductive barriers in the tomato clade <sup>21</sup>. We confirmed it by our results on the absence of COs in  
412 SV regions of multiple interspecific crosses. Some of these recombination coldspots contain  
413 supergenes which may confer alternative or differentiated phenotype between the parental  
414 genomes <sup>11</sup>. This information can help identify unfavorable gene complexes prior to the  
415 hybridization, exposing possible undesired consequences of introgression. In this study, we showed  
416 that some CO coldspots in interspecific hybrids overlap *R* gene hotspots, which not only accumulated  
417 nucleotide variations during the evolution of wild tomato relatives but underwent copy expansion  
418 and contraction, conferring varying resistance to pathogens <sup>65</sup>. But the CO suppression prevents  
419 traditional introgression methods from selecting favorable alleles and gene copies in these *R* gene  
420 hotspots <sup>66</sup>, curbing the efforts to develop disease-resistant tomato. Furthermore, some coldspots  
421 contain genes associated with metabolic processes and fruit traits, implying linkage between genes  
422 that may relate with the considerable change in chemical composition of tomato fruit due to fruit  
423 mass-targeted selection during domestication <sup>47</sup>. These coldspots can serve as targets for metabolite  
424 engineering in *de novo* domestication of wild tomato relatives. The enrichment of genes in CO  
425 coldspots linked with resistance and metabolomes is partly brought about by plant evolutionary  
426 events involving SVs <sup>38,45</sup>. Further examination of recombination coldspots can help breeders to  
427 understand the genetic or epigenetic cause of CO suppression and determine divergent phenotypes  
428 resulting from the evolution of locally adapted alleles and from domestication.

429 Aside from the association between SVs and CO coldspots, we also found specific  
430 superfamilies of TEs exhibiting strong association with crossovers and accessible chromatin regions.  
431 By checking the ACRs in meiocytes, we determined that the varying association between  
432 superfamilies may be influenced by their chromatin configuration, keeping elements like *Gypsy* and  
433 *Copia* inaccessible during meiosis which consequently prohibits COs. We also discovered differential  
434 chromatin accessibility of TE elements in somatic and meiotic cells, necessitating further studies to  
435 explain whether this relate with different functions or the regulation to limit proliferation of specific  
436 TEs during meiosis <sup>67</sup>. Although we found an association between TEs and COs, it is not clear whether  
437 TEs directly shape the recombination landscape, or that recombination and TE insertions simply  
438 collocate in ACRs and genic regions because of TE insertion bias <sup>31,40</sup>. In tomato, *Stowaway* elements  
439 preferentially inserts within or near genes while *Gypsy* elements inserts in pericentromeric regions

440 <sup>68,69</sup>, agreeing with the correlation of COs and TEs. On the other hand, the consistent chromatin state  
441 per TE superfamilies may indicate that, depending on the type, new TE insertions can either  
442 suppress or promote recombination <sup>31,40</sup>. For example, the expansion of pericentromeric regions in  
443 *A. alpina* due to retrotransposon insertions resulted to more regions with suppressed  
444 recombination<sup>70</sup>. It would also be interesting to further examine how the activity of TEs, such as  
445 during stress exposure, can influence the recombination landscape <sup>71,72</sup>. With the findings we have,  
446 the value of both SV and TE profiles in the parental genomes for CO hotspots and coldspots  
447 prediction becomes more apparent.

448 Previous studies have actually tried to increase CO frequencies but failed to do it  
449 homogeneously along the genome <sup>73-75</sup>, missing regions CO coldspots. Recently, it was demonstrated  
450 that recombination can be restored by inverting an inversion using genome editing (Schmidt *et al.*,  
451 2020). However, current regulations may restrict how solution to break linkage drag based on  
452 genome editing may serve direct breeding applications. Alternatively, we demonstrated that we can  
453 find bridge accessions that can solve the lack of recombination in regions with SVs while maintaining  
454 the desired genetic background. However, it is dependent on whether those accessions exist in  
455 nature or not and on the comprehensiveness of the resequencing data. Recent work by Alonge, et al.  
456 <sup>34</sup> involves the profiling of SVs in 100 subset accessions that represent the diversity of over 800  
457 tomato accessions, providing more data that can be used in finding compatible genomes. If we  
458 cannot find a bridge accession and the SV of interest is heterozygous in one of the parents, it is  
459 possible to screen for a homozygous genotype from an offspring population. Nevertheless, we  
460 emphasize the importance and advantage of doing compatibility or linkage drag checks, in a cost-  
461 effective way, as part of the breeding scheme. Future work can focus on profiling CO-associated  
462 features in resequencing data of tomato and wild relative populations and on predicting CO  
463 coldspots between a pair of accessions without developing a mapping population.

464

465



## 466 **Methods**

### 467 **Sequencing of pollen gametes**

468 We produced F1 plants from crosses between *S. lycopersicum* cv. Heinz1706 and the following wild  
469 relatives: *S. pimpinellifolium* (CGN14498), *S. neorickii* (LA0735), *S. chmielewskii* (LA2663),  
470 *S. habrochaites* (LYC4), and *S. pennelli* (LA0716). The wild species served as the male parents. Mature  
471 pollen were collected from each hybrid and processed to isolate the high molecular weight DNA  
472 using the protocol in Fuentes, et al. <sup>23</sup>. 10X Genomics libraries were constructed according to the  
473 Chromium™ Genome v2 Protocol (CG00043) and then sequenced on an Illumina HiSeq 2500. Aside  
474 from the sequencing pool of pollen from these hybrids, we used the same protocols to sequence the  
475 inbreds of the parental tomato and the wild species.

### 476 **Crossover detection**

477 For detecting segregating markers in the hybrids, linked reads from the inbred wild parents were  
478 aligned against the *S. lycopersicum* cv. Heinz reference genome SL4.0; <sup>76</sup> using *Longranger* <sup>77</sup> and  
479 were subsequently processed using GATK HaplotypeCaller <sup>78</sup> with the recommended hard filtering to  
480 screen single nucleotide polymorphisms (SNPs). Heterozygous SNPs and other SNPs located in  
481 homopolymeric regions and regions prone to false positives due to inaccurate assembly or copy  
482 number variations, resulting in highly heterozygous alignments, were filtered out. Thereafter, for  
483 each hybrid, the linked reads from pollen gametes were aligned against SL4.0 using *Longranger* and  
484 were phased using the segregating markers as described in Fuentes, et al. <sup>23</sup>. For each putative  
485 recombinant molecule, we applied filters on the resolution, spanning distance, block size, and the  
486 number of supporting reads, wild cards and markers per phased block. In the updated version of our  
487 pipeline <sup>23</sup>, filtering putative recombinant molecules with significant overlap with repeats and  
488 transposable elements was deprecated to enable analysis of correlation between COs and  
489 superfamilies of TEs. The number of overlapping crossover events between hybrids and their  
490 significance were determined using *bedtools* <sup>79</sup>. To compare the landscape, Pearson's correlation  
491 matrix was computed on the CO count in 500-kb windows with 50-kb step size.

### 492 **Detection of coldspots**

493 We counted the number of COs per hybrid in 10kb sliding windows and merged those windows with  
494 at least one CO and within 1kb distance of each other. The resulting set of genomic intervals are  
495 considered CO regions. Regions without COs spanning at least 1Mb are considered coldspots. To  
496 cluster coldspots from all hybrids, we first grouped those with at least 1 bp overlap. For each group,  
497 we built a graph with coldspots as nodes, connected by edges if they have a least 50% reciprocal  
498 overlap. Each graph was split into connected components (C) and then based on the genomic

499 position, we computed the distance ( $p_k$ ) between the leftmost and rightmost coldspot in each  
500 component. If  $p_k$  is at least 1.5 times the size of the smallest coldspots in  $C_k$ , the component was  
501 further regrouped by hierarchical clustering using a distance matrix  $d(i,j) = (f-2*\text{length}(i\cap j))/(f-$   
502  $\text{length}(i\cup j))$ , where  $i$  and  $j$  is the pair of coldspots in a component and  $f$  is the sum of their lengths.  
503 Hierarchical clustering by complete linkage was used; the resulting dendrogram was cut at the  
504 height of 0.3. The resulting groups were used to define shared coldspots, which occur in at least two  
505 hybrids, and unique coldspots *i.e.* those coldspots that occur only in one hybrid. We also identified  
506 conserved coldspots or regions without CO in all five hybrids.

### 507 **Detection and validation of SVs**

508 Linked reads from inbreds of all the parental species were aligned to the reference genome and  
509 analyzed to detect SVs using *Longranger*. With the presence of heterozygous SVs in the parental  
510 genomes, it is possible that only the reference allele may have been inherited by the F1 plants. To  
511 determine for each hybrid whether the F1 plants inherited an SV allele causing heterozygosity  
512 between the homologous chromosomes during meiosis, we profiled SVs in the F1 pollen linked-  
513 reads. The pool of pollen included both recombinant and non-recombinant regions and represented  
514 alleles from both parental genomes of each F1 plant. Thereafter, SVs were reported if present in  
515 both the inbred and the corresponding pollen data, referring to them as *parental SVs*. To further  
516 remove problematic regions, SVs between the Heinz reference and the Heinz inbred, which we refer  
517 here as *self SV*, were detected. Lastly, we reported parental SVs, of the deletion (DEL) and inversion  
518 (INV) type, that do not overlap self SV. For SV validation, we compared the SL4.0 assembly against  
519 the existing assembly of *S. pennellii*<sup>80</sup> using Syri<sup>81</sup> and manually inspected randomly selected sets of  
520 DELs and INVs using Gepard<sup>82</sup>.

### 521 **Enrichment analysis**

522 To determine the enrichment of COs in specific TE superfamilies, we generated 10,000 permutations  
523 of the CO data per hybrid using bedtools and computed the number of overlaps with transposable  
524 elements. We then compared the observed and the expected overlap with TE of these CO regions.  
525 For detecting overrepresented motifs, we retrieved the genomic sequences spanning CO regions  
526 with a resolution above 0.002, including the 3-kb flanking regions, and analyzed these with the  
527 MEME suite<sup>83</sup> using default parameters. Furthermore, we generated a list of genes present in the  
528 CO and coldspot regions and subsequently ran Panther<sup>84</sup> to identify enriched GO Terms. We also  
529 computed the number of resistance genes<sup>53</sup> and historical recombination hotspots<sup>15</sup> in the CO  
530 coldspots.

### 531 **Genotyping of population data**

532 Using *bwa mem*<sup>85</sup>, we aligned a set of resequencing data for 357 accessions compiled in Fuentes, et  
533 al.<sup>15</sup> against the SL4.0 reference genome. SNPs were detected using GATK HaplotypeCaller and were  
534 further filtered using GATK joint-genotyping and hard filtering. We then selected biallelic SNPs with a  
535 minimum allele frequency of 0.05 and less than 10% missing data using bcftools<sup>86</sup> and imputed  
536 missing calls using Beagle v 5.1<sup>87</sup>. To detect SVs, we ran Delly<sup>88</sup> for each accession and then we  
537 genotype SV sites across all accessions. We selected an inversion event and filtered accessions with  
538 missing calls, retaining 292 accessions. With SNPs in this inversion region, we generated and  
539 visualized the neighbor-joining tree using Mega7<sup>89</sup> and Figtree  
540 (<http://tree.bio.ed.ac.uk/software/figtree/>), respectively.

#### 541 **ACR Detection**

542 Tomato plants were grown and cultivated in a greenhouse with a photoperiod of 16 hours light and  
543 8 hours dark, and a minimum temperature of 16°C. Only healthy four- to seven-week-old plants  
544 were used in all experiments. The youngest leaves (the most apical) were used to isolate somatic  
545 nuclei. Meiocytes were isolated from young flower buds containing anthers that were less than 2  
546 mm in size. Microscopic analysis revealed that at this stage in anther development nearly all  
547 meiocytes are in prophase I.

548  
549 For nuclei isolation, approximately 0.4 g of young tomato leaves, or anthers from 20 prophase I  
550 flower buds were collected and immediately chopped in 2mL pre-chilled lysis buffer (15mM Tris-HCl  
551 pH7.5, 20mM NaCl, 80mM KCl, 0.5mM spermine, 5mM 2-mercaptoethanol, 0.2% Triton X-100) until  
552 a homogenous suspension was obtained. The suspensions were filtered twice through Miracloth and  
553 subsequently loaded gently on the surface of 2mL dense sucrose buffer (20mM Tris-HCl pH 8.0,  
554 2mM MgCl<sub>2</sub>, 2mM EDTA, 25mM 2-Mercaptoethanol, 1.7M sucrose, 0.2% Triton X-100) in a 15mL  
555 Falcon tube. The nuclei were centrifuged at 2200g at 4°C for 20 minutes and the pellets were  
556 resuspended in 500µL pre-chilled lysis buffer.

557  
558 Nuclei were kept on ice during the entire sorting procedure. Nuclei were first stained with 4,6-  
559 Diamidino-2-phenylindole (DAPI) and examined for integrity and purity using a Zeiss Axioskop2  
560 microscope. Once the integrity and purity of nuclei was confirmed, nuclei were sorted in a BD FACS  
561 Aria III sorter. A total of 50,000 nuclei were sorted based on their size, shape and the intensity of the  
562 DAPI signal, which indicates the ploidy levels of the nuclei. 2n nuclei were sorted from young leaf  
563 samples, while 4n nuclei, corresponding to meiocytes, were sorted from anther samples. After  
564 sorting, nuclei were once more checked for integrity and purity under a microscope. Nuclei were

565 transferred from sorting tubes to LoBind Eppendorf tubes and centrifuged at 1000g at 4°C for 10 min  
566 and then washed with Tris-Mg Buffer (10mM Tris-HCl pH 8.0, 5mM MgCl<sub>2</sub>).

567

568 Tn5 integration was performed as previously published <sup>90</sup> on purified nuclei using the Nextera  
569 Illumina kit (Illumina, FC 121 1031) at 37 °C for 30 min. After tagmentation (insertion of the  
570 sequencing adapter into accessible chromatin), the tagged DNA was purified with a Qiagen MinElute  
571 PCR purification kit. To generate an ATAC-seq library for sequencing, tagged fragments were  
572 amplified by two successive rounds of PCR. In the first round of PCR, the fragments were amplified  
573 by only 3 PCR cycles using the NEBNext High-Fidelity 2xPCR Master Mix and the Custom Nextera PCR  
574 Primer 1 and barcoded sets of Primer 2. Subsequently, 2.5 µL of the PCR amplified DNA was  
575 subjected to quantitative PCR to estimate the relative amount of successfully tagged DNA fragments  
576 and to determine the optimal number of amplification cycles for the second round of PCR. The latter  
577 was estimated by plotting fluorescence values against the number of cycles. The number of cycles  
578 required for the second PCR amplification equals the number of cycles that results in 25% of the  
579 maximum fluorescent intensity <sup>91</sup>. ATAC-seq libraries generated were purified using AMPure XP  
580 beads (Beckman Coulter) and quantified using Qubit DNA high sensitivity assay in combination with  
581 TapeStation D1000 prior to sequencing.

582

583 Sequencing was carried out using an Illumina NextSeq 500. A snakemake analysis workflow  
584 ([https://github.com/KoesGroup/Snakemake\\_ATAC\\_seq](https://github.com/KoesGroup/Snakemake_ATAC_seq)) was used for the analysis of the ATAC-seq  
585 dataset with the default parameters of the configuration files. Briefly, paired-end sequencing reads  
586 were trimmed to remove the Illumina adapter sequences using Trimmomatic 0.38 <sup>92</sup>. Only reads with  
587 a quality score (Phred) above 30 were kept and mapped to the SL4.0 version of the tomato genome,  
588 tomato chloroplast genome and tomato mitochondrial genome using Bowtie2 <sup>93</sup>. Only reads  
589 mapping to a unique position in the tomato genome were used for further analysis. Reads mapping  
590 to the tomato genome were then shifted to correspond to the real Tn5 binding location using the  
591 Deeptools alignmentSieve with the parameter “ -ATACshift”. ATAC peaks were called using the  
592 MACS2 algorithm <sup>94,95</sup>.

593

594 Reads mapping uniquely to the transposable element annotation were counted using bedtools. Read  
595 counts were normalized by the total number of reads in the library and then grouped by the  
596 transposable element classes. Heatmaps and clustering was performed using the pheatmap package  
597 1.0.8 (CRAN).

598

599 **Acknowledgements**

600 This project was supported by the MEICOM Marie Skłodowska-Curie Innovative Training Network  
601 (ITN), H2020-MSCA-ITN-2017 Horizon 2020 Grant agreement number 765212 and by the  
602 Netherlands Top Consortium for Knowledge and Innovation (TKI project LWV19283). We also thank  
603 ENZA Zaden Research & Development B.V., Bejo Zaden B.V., Hortigenetics Research (S.E. Asia)  
604 Limited, Syngenta Seeds B.V., and KWS Saat SE & Co KGaA for support. The parental seed material  
605 was donated by the Centre for Genetic Resource, The Netherlands.

606 **Author Contributions**

607 R.F., S.P., D.R. and A.D. designed and initiated the study. T.H., W.D., H.B., and E.L. generated the 10x  
608 Genomics sequencing data. R.N. performed the SNP calling. R.F. performed all analyses on  
609 crossovers. J.C., P.F. and M.S. generated and analyzed the ACRs. S.P., D.R., A.D.,S.T. and H.J.  
610 contributed to interpreting the data. R.F. wrote the paper with additional input from all others  
611 authors.

612 **Competing Interest**

613 The authors declare no competing interests.

614 **References**

- 615 1. Bailey-Serres, J., Parker, J.E., Ainsworth, E.A., Oldroyd, G.E.D. & Schroeder, J.I. Genetic  
616 strategies for improving crop yields. *Nature* **575**, 109-118 (2019).
- 617 2. Ortiz-Barrientos, D., Engelstadter, J. & Rieseberg, L.H. Recombination Rate Evolution and the  
618 Origin of Species. *Trends Ecol Evol* **31**, 226-236 (2016).
- 619 3. Mercier, R., Mezard, C., Jenczewski, E., Macaisne, N. & Grelon, M. The molecular biology of  
620 meiosis in plants. *Annu Rev Plant Biol* **66**, 297-327 (2015).
- 621 4. Underwood, C.J. & Choi, K. Heterogeneous transposable elements as silencers, enhancers  
622 and targets of meiotic recombination. *Chromosoma* **128**, 279-296 (2019).
- 623 5. Seah, S., Yaghoobi, J., Rossi, M., Gleason, C.A. & Williamson, V.M. The nematode-resistance  
624 gene, Mi-1, is associated with an inverted chromosomal segment in susceptible compared to  
625 resistant tomato. *Theor Appl Genet* **108**, 1635-42 (2004).
- 626 6. Rowan, B.A. *et al.* An Ultra High-Density Arabidopsis thaliana Crossover Map That Refines  
627 the Influences of Structural Variation and Epigenetic Features. *Genetics* **213**, 771-787 (2019).
- 628 7. Crow, T. *et al.* Gene regulatory effects of a large chromosomal inversion in highland maize.  
629 *PLoS Genet* **16**, e1009213 (2020).
- 630 8. Wang, Y. & Copenhaver, G.P. Meiotic Recombination: Mixing It Up in Plants. *Annu Rev Plant*  
631 *Biol* **69**, 577-609 (2018).
- 632 9. Szinay, D. *et al.* Chromosome evolution in Solanum traced by cross-species BAC-FISH. *New*  
633 *Phytol* **195**, 688-698 (2012).
- 634 10. Jiao, W.B. & Schneeberger, K. Chromosome-level assemblies of multiple Arabidopsis  
635 genomes reveal hotspots of rearrangements with altered evolutionary dynamics. *Nat*  
636 *Commun* **11**, 989 (2020).
- 637 11. Schwander, T., Libbrecht, R. & Keller, L. Supergenes and complex phenotypes. *Curr Biol* **24**,  
638 R288-94 (2014).
- 639 12. Thompson, M.J. & Jiggins, C.D. Supergenes and their role in evolution. *Heredity (Edinb)* **113**,  
640 1-8 (2014).
- 641 13. Kirkpatrick, M. How and why chromosome inversions evolve. *PLoS Biol* **8**(2010).
- 642 14. Moyers, B.T., Morrell, P.L. & McKay, J.K. Genetic Costs of Domestication and Improvement. *J*  
643 *Hered* **109**, 103-116 (2018).
- 644 15. Fuentes, R.R., de Ridder, D., van Dijk, A.D.J. & Peters, S.A. Domestication Shapes  
645 Recombination Patterns in Tomato. *Mol Biol Evol* **39**(2022).
- 646 16. Franz, P. *et al.* Molecular, genetic and evolutionary analysis of a paracentric inversion in  
647 Arabidopsis thaliana. *Plant J* **88**, 159-178 (2016).
- 648 17. Casselman, A.L. *et al.* Determining the physical limits of the Brassica S locus by  
649 recombinational analysis. *Plant Cell* **12**, 23-33 (2000).
- 650 18. Lowry, D.B. & Willis, J.H. A widespread chromosomal inversion polymorphism contributes to  
651 a major life-history transition, local adaptation, and reproductive isolation. *PLoS Biol*  
652 **8**(2010).
- 653 19. Yang, X. *et al.* Fine mapping of the tomato yellow leaf curl virus resistance gene Ty-2 on  
654 chromosome 11 of tomato. *Mol Breed* **34**, 749-760 (2014).
- 655 20. Wolters, A.M. *et al.* Detection of an inversion in the Ty-2 region between *S. lycopersicum*  
656 and *S. habrochaites* by a combination of de novo genome assembly and BAC cloning. *Theor*  
657 *Appl Genet* **128**, 1987-97 (2015).
- 658 21. Anderson, L.K., Covey, P.A., Larsen, L.R., Bedinger, P. & Stack, S.M. Structural differences in  
659 chromosomes distinguish species in the tomato clade. *Cytogenet Genome Res* **129**, 24-34  
660 (2010).
- 661 22. Demirci, S. *et al.* Distribution, position and genomic characteristics of crossovers in tomato  
662 recombinant inbred lines derived from an interspecific cross between *Solanum lycopersicum*  
663 and *Solanum pimpinellifolium*. *Plant Journal* **89**, 554-564 (2017).



- 664 23. Fuentes, R. *et al.* Meiotic recombination profiling of interspecific hybrid F1 tomato pollen by  
665 linked read sequencing. *Plant J* **102**, 480-492 (2020).
- 666 24. Choi, K. & Henderson, I.R. Meiotic recombination hotspots - a comparative view. *Plant J* **83**,  
667 52-61 (2015).
- 668 25. Lambing, C., Franklin, F.C.H. & Wang, C.-J.R. Understanding and Manipulating Meiotic  
669 Recombination in Plants. *Plant Physiology* **173**, 1530-1542 (2017).
- 670 26. Termolino, P., Cremona, G., Consiglio, M.F. & Conicella, C. Insights into epigenetic landscape  
671 of recombination-free regions. *Chromosoma* **125**, 301-8 (2016).
- 672 27. Yelina, N., Diaz, P., Lambing, C. & Henderson, I.R. Epigenetic control of meiotic  
673 recombination in plants. *Sci China Life Sci* **58**, 223-31 (2015).
- 674 28. Tock, A.J. & Henderson, I.R. Hotspots for Initiation of Meiotic Recombination. *Front Genet* **9**,  
675 521 (2018).
- 676 29. Wijnker, E. *et al.* The genomic landscape of meiotic crossovers and gene conversions in  
677 *Arabidopsis thaliana*. *Elife* **2**, e01426 (2013).
- 678 30. Shilo, S., Melamed-Bessudo, C., Dorone, Y., Barkai, N. & Levy, A.A. DNA Crossover Motifs  
679 Associated with Epigenetic Modifications Delineate Open Chromatin Regions in *Arabidopsis*.  
680 *Plant Cell* **27**, 2427-36 (2015).
- 681 31. Choi, K. *et al.* Nucleosomes and DNA methylation shape meiotic DSB frequency in  
682 *Arabidopsis thaliana* transposons and gene regulatory regions. *Genome Research* **28**, 532-  
683 546 (2018).
- 684 32. Marand, A.P. *et al.* Historical Meiotic Crossover Hotspots Fueled Patterns of Evolutionary  
685 Divergence in Rice. *Plant Cell* **31**, 645-662 (2019).
- 686 33. Schwarzkopf, E.J., Motamayor, J.C. & Cornejo, O.E. Genetic differentiation and intrinsic  
687 genomic features explain variation in recombination hotspots among cocoa tree  
688 populations. *BMC Genomics* **21**, 332 (2020).
- 689 34. Alonge, M. *et al.* Major Impacts of Widespread Structural Variation on Gene Expression and  
690 Crop Improvement in Tomato. *Cell* **182**, 145-161 e23 (2020).
- 691 35. Shen, C. *et al.* Population genomics reveals a fine-scale recombination landscape for genetic  
692 improvement of cotton. *Plant J* **99**, 494-505 (2019).
- 693 36. Wang, X. *et al.* Genome of *Solanum pimpinellifolium* provides insights into structural  
694 variants during tomato breeding. *Nat Commun* **11**, 5817 (2020).
- 695 37. Sim, S.C. *et al.* Development of a large SNP genotyping array and generation of high-density  
696 genetic maps in tomato. *PLoS One* **7**, e40563 (2012).
- 697 38. Lye, Z.N. & Purugganan, M.D. Copy Number Variation in Domestication. *Trends Plant Sci* **24**,  
698 352-365 (2019).
- 699 39. He, Y. *et al.* Genomic features shaping the landscape of meiotic double-strand-break  
700 hotspots in maize. *Proc Natl Acad Sci U S A* **114**, 12231-12236 (2017).
- 701 40. Kent, T.V., Uzunovic, J. & Wright, S.I. Coevolution between transposable elements and  
702 recombination. *Philos Trans R Soc Lond B Biol Sci* **372**(2017).
- 703 41. Marand, A.P. *et al.* Meiotic crossovers are associated with open chromatin and enriched  
704 with Stowaway transposons in potato. *Genome Biol* **18**, 203 (2017).
- 705 42. Pan, Q., Deng, M., Yan, J. & Li, L. Complexity of genetic mechanisms conferring  
706 nonuniformity of recombination in maize. *Sci Rep* **7**, 1205 (2017).
- 707 43. Qiu, Z. *et al.* Identification of Regulatory DNA Elements Using Genome-wide Mapping of  
708 DNase I Hypersensitive Sites during Tomato Fruit Development. *Mol Plant* **9**, 1168-1182  
709 (2016).
- 710 44. Tieman, D. *et al.* A chemical genetic roadmap to improved tomato flavor. *Science* **355**, 391-  
711 394 (2017).
- 712 45. Alseekh, S. *et al.* Domestication of Crop Metabolomes: Desired and Unintended  
713 Consequences. *Trends Plant Sci* **26**, 650-661 (2021).

- 714 46. Sauvage, C. *et al.* Domestication rewired gene expression and nucleotide diversity patterns  
715 in tomato. *Plant J* **91**, 631-645 (2017).
- 716 47. Zhu, G. *et al.* Rewiring of the Fruit Metabolome in Tomato Breeding. *Cell* **172**, 249-261 e12  
717 (2018).
- 718 48. Lin, T. *et al.* Genomic analyses provide insights into the history of tomato breeding. *Nat*  
719 *Genet* **46**, 1220-6 (2014).
- 720 49. Zhu, Q., Maher, E.A., Masoud, S., Dixon, R.A. & Lamb, C.J. Enhanced Protection Against  
721 Fungal Attack by Constitutive Co-expression of Chitinase and Glucanase Genes in Transgenic  
722 Tobacco. *Nature Biotechnology* **12**, 807-812 (1994).
- 723 50. Shrestha, C.L., Oña, I., Muthukrishnan, S. & Mew, T.W. Chitinase levels in rice cultivars  
724 correlate with resistance to the sheath blight pathogen *Rhizoctonia solani*. *European Journal*  
725 *of Plant Pathology* **120**, 69-77 (2007).
- 726 51. Herget, T., Schell, J. & Schreier, P.H. Elicitor-specific induction of one member of the  
727 chitinase gene family in *Arachis hypogaea*. *Mol Gen Genet* **224**, 469-76 (1990).
- 728 52. Choi, K. *et al.* Recombination Rate Heterogeneity within *Arabidopsis* Disease Resistance  
729 Genes. *PLoS Genet* **12**, e1006179 (2016).
- 730 53. Nieri, D., Di Donato, A. & Ercolano, M.R. Analysis of tomato meiotic recombination profile  
731 reveals preferential chromosome positions for NB-LRR genes. *Euphytica* **213**(2017).
- 732 54. Hulbert, S.H., Webb, C.A., Smith, S.M. & Sun, Q. Resistance gene complexes: evolution and  
733 utilization. *Annu Rev Phytopathol* **39**, 285-312 (2001).
- 734 55. Chitwood-Brown, J., Vallad, G.E., Lee, T.G. & Hutton, S.F. Characterization and elimination of  
735 linkage-drag associated with *Fusarium* wilt race 3 resistance genes. *Theor Appl Genet* **134**,  
736 2129-2140 (2021).
- 737 56. van der Knaap, E., Sanyal, A., Jackson, S.A. & Tanksley, S.D. High-resolution fine mapping and  
738 fluorescence in situ hybridization analysis of sun, a locus controlling tomato fruit shape,  
739 reveals a region of the tomato genome prone to DNA rearrangements. *Genetics* **168**, 2127-  
740 40 (2004).
- 741 57. Rodriguez, G.R. *et al.* Distribution of SUN, OVATE, LC, and FAS in the tomato germplasm and  
742 the relationship to fruit shape diversity. *Plant Physiol* **156**, 275-85 (2011).
- 743 58. Huang, Z., Van Houten, J., Gonzalez, G., Xiao, H. & van der Knaap, E. Genome-wide  
744 identification, phylogeny and expression analysis of SUN, OFP and YABBY gene family in  
745 tomato. *Mol Genet Genomics* **288**, 111-29 (2013).
- 746 59. Cong, B., Barrero, L.S. & Tanksley, S.D. Regulatory change in YABBY-like transcription factor  
747 led to evolution of extreme fruit size during tomato domestication. *Nat Genet* **40**, 800-4  
748 (2008).
- 749 60. Huang, Z. & van der Knaap, E. Tomato fruit weight 11.3 maps close to fasciated on the  
750 bottom of chromosome 11. *Theor Appl Genet* **123**, 465-74 (2011).
- 751 61. Xu, C. *et al.* A cascade of arabinosyltransferases controls shoot meristem size in tomato. *Nat*  
752 *Genet* **47**, 784-92 (2015).
- 753 62. Crown, K.N., Miller, D.E., Sekelsky, J. & Hawley, R.S. Local Inversion Heterozygosity Alters  
754 Recombination throughout the Genome. *Curr Biol* **28**, 2984-2990 e3 (2018).
- 755 63. Korunes, K.L. & Noor, M.A.F. Pervasive gene conversion in chromosomal inversion  
756 heterozygotes. *Mol Ecol* **28**, 1302-1315 (2019).
- 757 64. Kirkpatrick, M. & Barton, N. Chromosome inversions, local adaptation and speciation.  
758 *Genetics* **173**, 419-34 (2006).
- 759 65. Seong, K., Seo, E., Witek, K., Li, M. & Staskawicz, B. Evolution of NLR resistance genes with  
760 noncanonical N-terminal domains in wild tomato species. *New Phytol* **227**, 1530-1543  
761 (2020).
- 762 66. Andolfo, G., D'Agostino, N., Frusciante, L. & Ercolano, M.R. The Tomato Interspecific NB-LRR  
763 Gene Arsenal and Its Impact on Breeding Strategies. *Genes (Basel)* **12**(2021).

- 764 67. Thieme, M. *et al.* Inhibition of RNA polymerase II allows controlled mobilisation of  
765 retrotransposons for plant breeding. *Genome Biol* **18**, 134 (2017).
- 766 68. Dominguez, M. *et al.* The impact of transposable elements on tomato diversity. *Nat*  
767 *Commun* **11**, 4058 (2020).
- 768 69. Kuang, H. *et al.* Identification of miniature inverted-repeat transposable elements (MITEs)  
769 and biogenesis of their siRNAs in the Solanaceae: new functional implications for MITEs.  
770 *Genome Res* **19**, 42-56 (2009).
- 771 70. Willing, E.M. *et al.* Genome expansion of *Arabis alpina* linked with retrotransposition and  
772 reduced symmetric DNA methylation. *Nat Plants* **1**, 14023 (2015).
- 773 71. Ito, H. *et al.* An siRNA pathway prevents transgenerational retrotransposition in plants  
774 subjected to stress. *Nature* **472**, 115-9 (2011).
- 775 72. Zervudacki, J. *et al.* Transcriptional control and exploitation of an immune-responsive family  
776 of plant retrotransposons. *EMBO J* **37**(2018).
- 777 73. Ziolkowski, P.A. *et al.* Natural variation and dosage of the HEI10 meiotic E3 ligase control  
778 Arabidopsis crossover recombination. *Genes Dev* **31**, 306-317 (2017).
- 779 74. Mieulet, D. *et al.* Unleashing meiotic crossovers in crops. *Nat Plants* **4**, 1010-1016 (2018).
- 780 75. Serra, H. *et al.* Massive crossover elevation via combination of HEI10 and *recq4a recq4b*  
781 during Arabidopsis meiosis. *Proc Natl Acad Sci U S A* **115**, 2437-2442 (2018).
- 782 76. Hosmani, P.S. *et al.* An improved de novo assembly and annotation of the tomato reference  
783 genome using single-molecule sequencing, Hi-C proximity ligation and optical maps. *bioRxiv*  
784 (2019).
- 785 77. Marks, P. *et al.* Resolving the full spectrum of human genome variation using Linked-Reads.  
786 *Genome Res* **29**, 635-645 (2019).
- 787 78. Poplin, R. *et al.* Scaling accurate genetic variant discovery to tens of thousands of samples.  
788 *bioRxiv* (2017).
- 789 79. Quinlan, A.R. & Hall, I.M. BEDTools: A flexible suite of utilities for comparing genomic  
790 features. *Bioinformatics* **26**, 841-842 (2010).
- 791 80. Bolger, A. *et al.* The genome of the stress-tolerant wild tomato species *Solanum pennellii*.  
792 *Nat Genet* **46**, 1034-8 (2014).
- 793 81. Goel, M., Sun, H., Jiao, W.B. & Schneeberger, K. SyRI: finding genomic rearrangements and  
794 local sequence differences from whole-genome assemblies. *Genome Biol* **20**, 277 (2019).
- 795 82. Krumsiek, J., Arnold, R. & Rattei, T. Gepard: a rapid and sensitive tool for creating dotplots  
796 on genome scale. *Bioinformatics* **23**, 1026-8 (2007).
- 797 83. Bailey, T.L., Johnson, J., Grant, C.E. & Noble, W.S. The MEME Suite. *Nucleic Acids Res* **43**,  
798 W39-49 (2015).
- 799 84. Mi, H., Muruganujan, A., Ebert, D., Huang, X. & Thomas, P.D. PANTHER version 14: more  
800 genomes, a new PANTHER GO-slim and improvements in enrichment analysis tools. *Nucleic*  
801 *Acids Res* **47**, D419-D426 (2019).
- 802 85. Li, H. Aligning sequence reads, clone sequences and assembly contigs with BWA-MEM. **00**, 3-  
803 3 (2013).
- 804 86. Danecek, P. *et al.* The variant call format and VCFtools. *Bioinformatics (Oxford, England)* **27**,  
805 2156-8 (2011).
- 806 87. Browning, B.L., Zhou, Y. & Browning, S.R. A One-Penny Imputed Genome from Next-  
807 Generation Reference Panels. *Am J Hum Genet* **103**, 338-348 (2018).
- 808 88. Rausch, T. *et al.* DELLY: structural variant discovery by integrated paired-end and split-read  
809 analysis. *Bioinformatics (Oxford, England)* **28**, i333-i339 (2012).
- 810 89. Kumar, S., Stecher, G. & Tamura, K. MEGA7: Molecular Evolutionary Genetics Analysis  
811 Version 7.0 for Bigger Datasets. *Mol Biol Evol* **33**, 1870-4 (2016).
- 812 90. Buenrostro, J.D., Wu, B., Chang, H.Y. & Greenleaf, W.J. ATAC-seq: A Method for Assaying  
813 Chromatin Accessibility Genome-Wide. *Current Protocols in Molecular Biology* **109**(2015).

- 814 91. Bajic, M., Maher, K.A. & Deal, R.B. Identification of Open Chromatin Regions in Plant  
815 Genomes Using ATAC-Seq. *Methods Mol Biol* **1675**, 183-201 (2018).  
816 92. Bolger, A.M., Lohse, M. & Usadel, B. Trimmomatic: a flexible trimmer for Illumina sequence  
817 data. *Bioinformatics* **30**, 2114-20 (2014).  
818 93. Langmead, B. & Salzberg, S.L. Fast gapped-read alignment with Bowtie 2. *Nat Methods* **9**,  
819 357-9 (2012).  
820 94. Zhang, Y. *et al.* Model-based analysis of ChIP-Seq (MACS). *Genome Biol* **9**, R137 (2008).  
821 95. Feng, J., Liu, T., Qin, B., Zhang, Y. & Liu, X.S. Identifying ChIP-seq enrichment using MACS. *Nat*  
822 *Protoc* **7**, 1728-40 (2012).  
823 96. Moyle, L.C. Ecological and evolutionary genomics in the wild tomatoes (*Solanum* sect.  
824 *Lycopersicon*). *Evolution* **62**, 2995-3013 (2008).

825

826

827

828 Table 1. Crossovers detected in multiple interspecific (with *S. lycopersicum*) hybrid populations

|                       | Number of SNPs | Number of COs | Distance (kb; 1/Resolution) | Distal euchromatin genes ( $p$ -val) * | Pericentric heterochromatin genes ( $p$ -val) * |
|-----------------------|----------------|---------------|-----------------------------|----------------------------------------|-------------------------------------------------|
| Pimpinellifolium (PM) | 4,742,049      | 1,040         | 2.3 ± 1.4                   | 9.3 × 10 <sup>-3</sup>                 | 8.2 × 10 <sup>-5</sup>                          |
| Neorickii (NE)        | 13,749,445     | 1,700         | 2.3 ± 1.5                   | 2.1 × 10 <sup>-107</sup>               | 4.3 × 10 <sup>-20</sup>                         |
| Chmielewskii (CH)     | 13,770,207     | 1,618         | 2.2 ± 1.5                   | 2.3 × 10 <sup>-104</sup>               | 4.4 × 10 <sup>-16</sup>                         |
| Habrochaites (HB)     | 14,909,955     | 832           | 1.9 ± 1.5                   | 6.9 × 10 <sup>-66</sup>                | 1.5 × 10 <sup>-9</sup>                          |
| Pennellii (PN)        | 15,447,841     | 1,192         | 2.1 ± 1.6                   | 1.2 × 10 <sup>-86</sup>                | 7.8 × 10 <sup>-30</sup>                         |

839

\*Enrichment of COs in genes based on permutation test

840

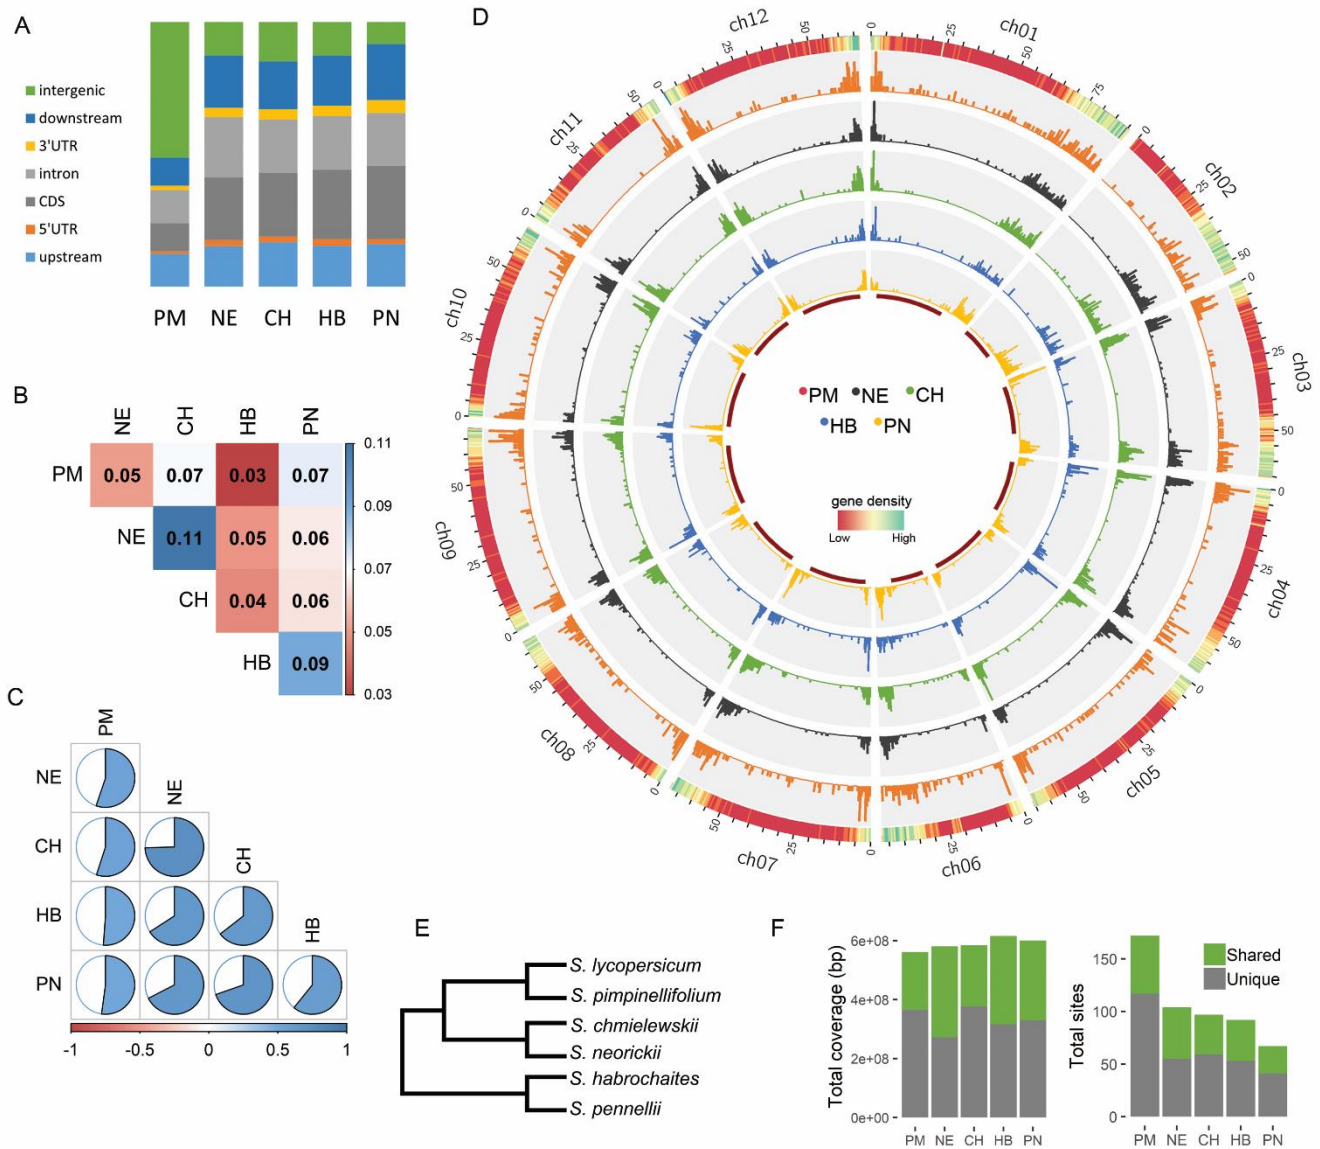

841

842 **Figure 1. Recombination landscape.** A) Distribution of crossover regions over gene features.  
 843 Upstream and downstream covers 1 kb from the transcription start and termination sites,  
 844 respectively. B) Fraction of shared CO sites and C) Correlation of the genome-wide CO landscape  
 845 between hybrids. D) Distribution of COs per hybrid. The outermost track indicates gene density while  
 846 the red innermost track marks the pericentric heterochromatin regions. E) Phylogenetic tree of the  
 847 parental species based on Moyle <sup>96</sup> F) Coverage and number of recombination coldspots in different  
 848 crosses.



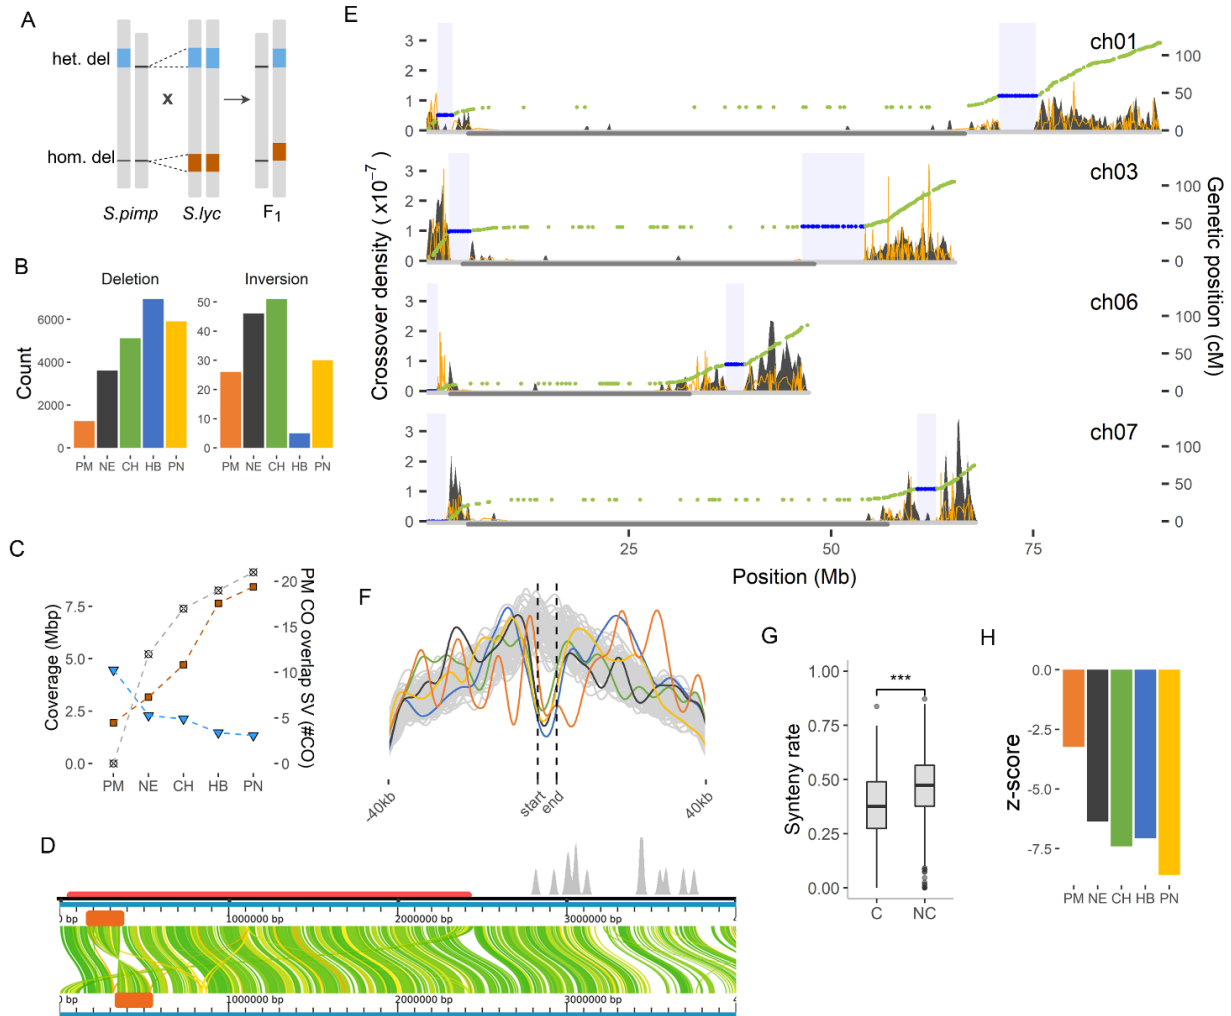

849

850 **Figure 2. Lack of crossover in structural variations.** A) Selection of parental SVs causing  
 851 heterozygosity in the F1 pollen genomes. B) Frequency of SVs per wild relative. Inversions only  
 852 include events > 30 kb. C) Genome coverage of COs (blue) and SVs (orange) in the PCH (left y-axis).  
 853 The gray squares show the number of PM COs that overlap with SV regions in the wild genome (right  
 854 y-axis). D) Large inversion (orange block) and rearrangements within the coldspot (horizontal purple  
 855 segment) of chromosome 7, short arm. CO density is indicated in grey at the top. E) Crossover  
 856 density of selected *S. pennellii* chromosomes (gray peaks) plotted together with Marey map (green  
 857 dots) of EXPEN2012 (Sin *et al.*, 2012). The blue dots are genetic markers within coldspot regions  
 858 (blue box). The yellow distribution line indicates the recombination rate obtained by taking the  
 859 derivative of the Marey map. The gray horizontal segment in the middle of the chromosome marks  
 860 the PCH. F) Distance of COs to the nearest SV compared to the 10,000 permutation sets represented  
 861 by gray lines. The vertical lines marks the boundaries of COs. G) Rate of syntenicity in coldspot (C) and  
 862 non-coldspot (NC) regions of *S. pennellii* (Wilcoxon rank-sum test;  $P < 2 \times 10^{-16}$ ). H) Suppression of COs  
 863 in SV regions based on permutation test. The negative z-score means the overlap of COs in SV  
 864 regions is lower than expected by chance.

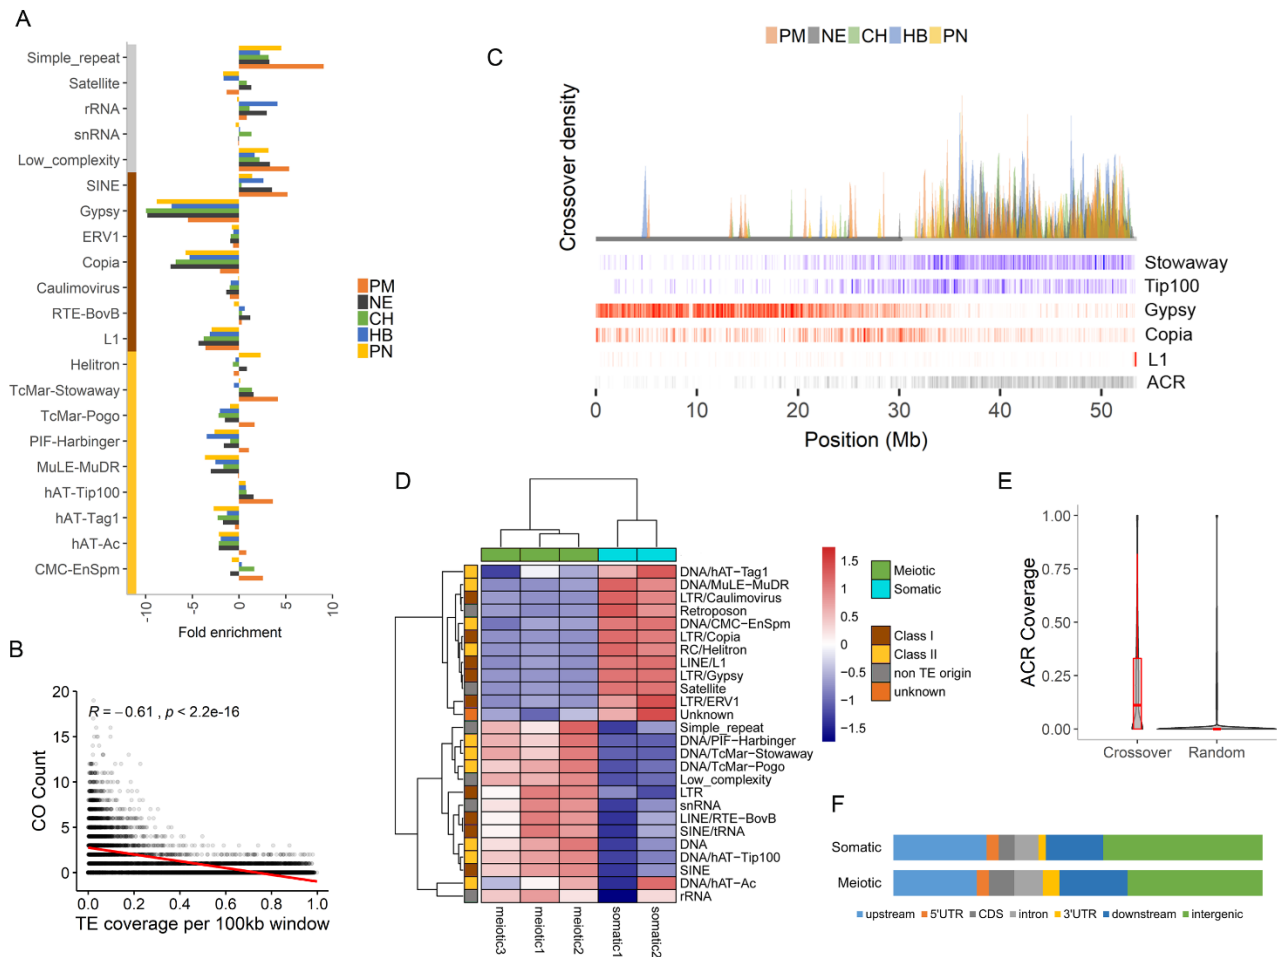

865

866 **Figure 3. TE-associated crossovers.** A) TE superfamilies and repeats showing enrichment of  
 867 crossovers. Elements are clustered into DNA transposons (yellow), retrotransposons (brown) and  
 868 other repeats (gray). B) Spearman's rank correlation of crossover count and retrotransposons  
 869 (Gypsy, Copia, L1) coverage in a sliding genome window. Each dot indicates a window. The red line is  
 870 the local regression fitting. C) Recombination landscape of acrocentric chromosome 2 from multiple  
 871 hybrids (colored peaks) with layers of density heatmaps representing different features, including  
 872 class I (red) and II (blue) TEs, and meiotic ACRs (gray). The horizontal grey line represents the PCH. D)  
 873 Normalized enrichment of ATAC-seq read coverage over repetitive elements of meiotic and somatic  
 874 cells. E) Total coverage of ACR per region F) Total ACR coverage per genome feature. Upstream and  
 875 downstream covers 1 kb from the transcription start and termination sites, respectively.  
 876

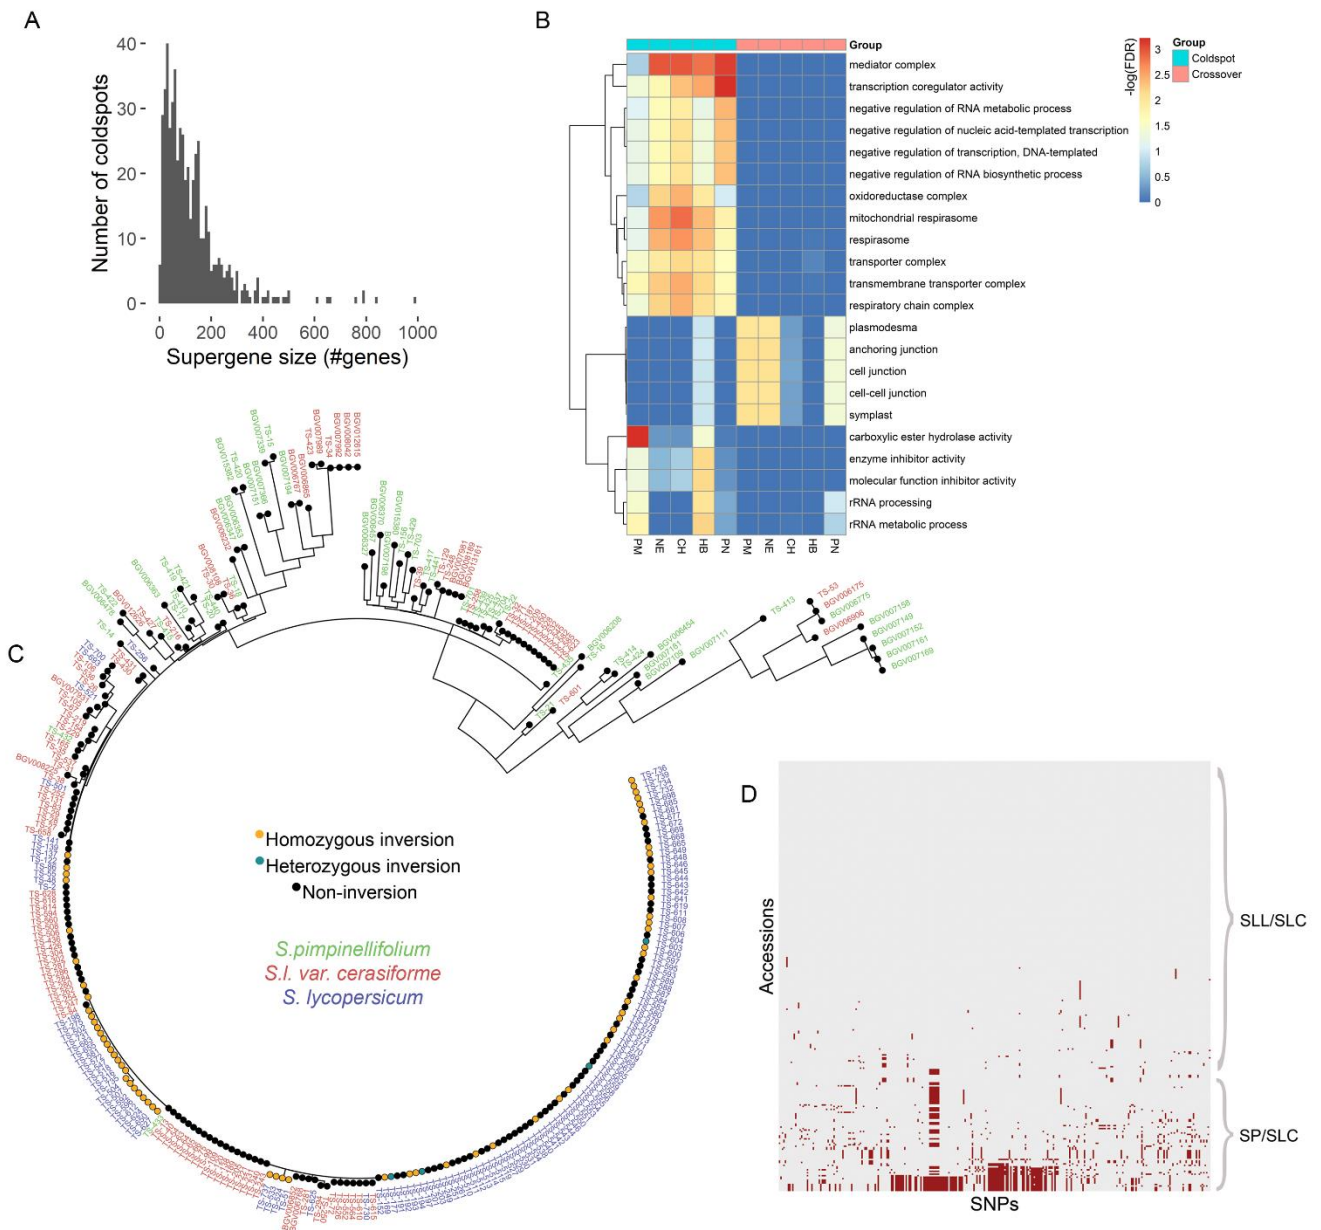

877

878 Figure 4. **Supergenes and inversions.** A) Sizes of supergene clusters in CO coldspots. B) Gene  
 879 ontology (GO) terms enriched (at least 2x) in coldspot and crossover regions. C) Phylogenetic tree of  
 880 genic SNPs in an inversion region of wild and domesticated tomato accessions. D) SNPs w.r.t *S.*  
 881 *lycopersicum* within the inversion region.

882

883 **Supplementary Figures**

884 **Supplementary Figure 1. False positive hotspots in pericentric heterochromatin.** A) Regions with  
885 excessive levels of heterozygosity and read coverage causing false positive crossovers (black box).  
886 Possibly, these regions are collapsed genomic segments in the reference genome or part of a copy  
887 number variation. B) The coverage and C) length distribution of these regions.

888

889

A

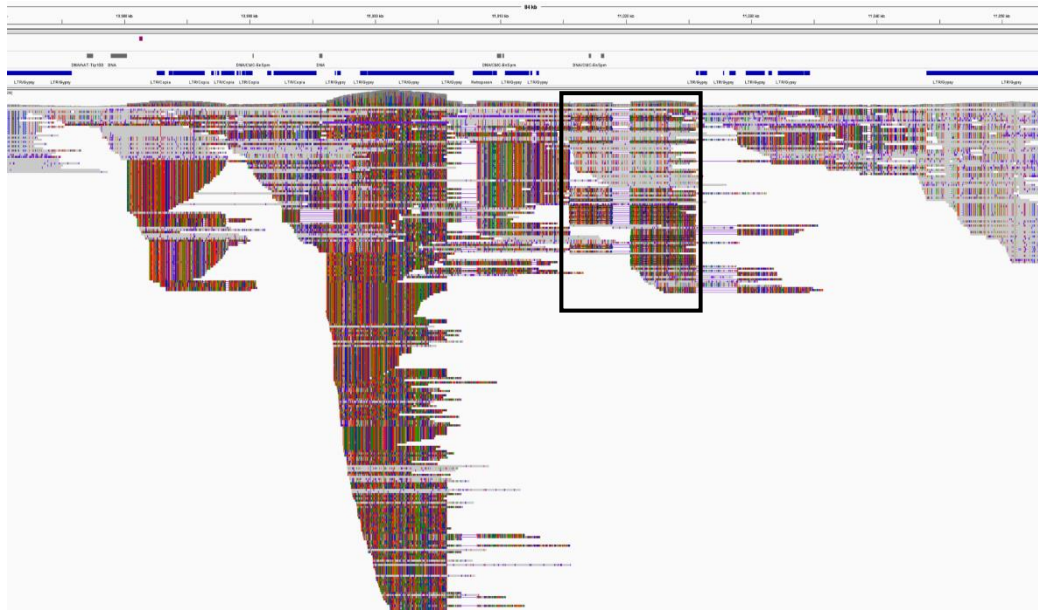

B

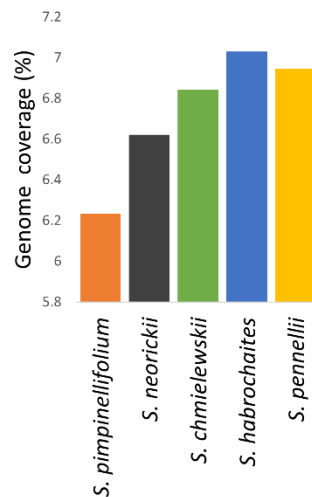

C

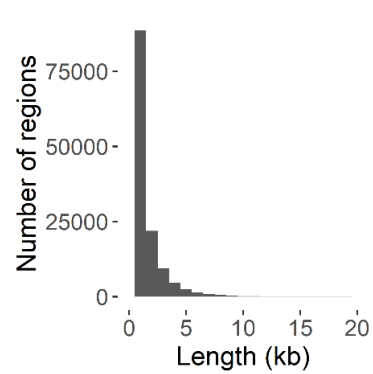

890 Supplementary Figure 2. **Filtering criteria on recombination molecules.** A) A lower limit on the size  
891 of a haplotype block (marked by a red vertical line) is set based on the distribution of all block sizes  
892 across all crosses. B) Distribution of resolution and spanning distance of each recombinant molecule.  
893 The yellow dots represent COs that passed the filtering. The blue lines mark the average spanning  
894 distance and resolution. C) Ratio of SNP and read count per haplotype block as a function of block  
895 length. Haplotype blocks with sizes below 1kb are supported by few reads with high SNP density  
896 which may result from mismapped reads, further supporting the cut-off for haplotype block size. D)  
897 Final set of COs that passed all filtering constraints.

898

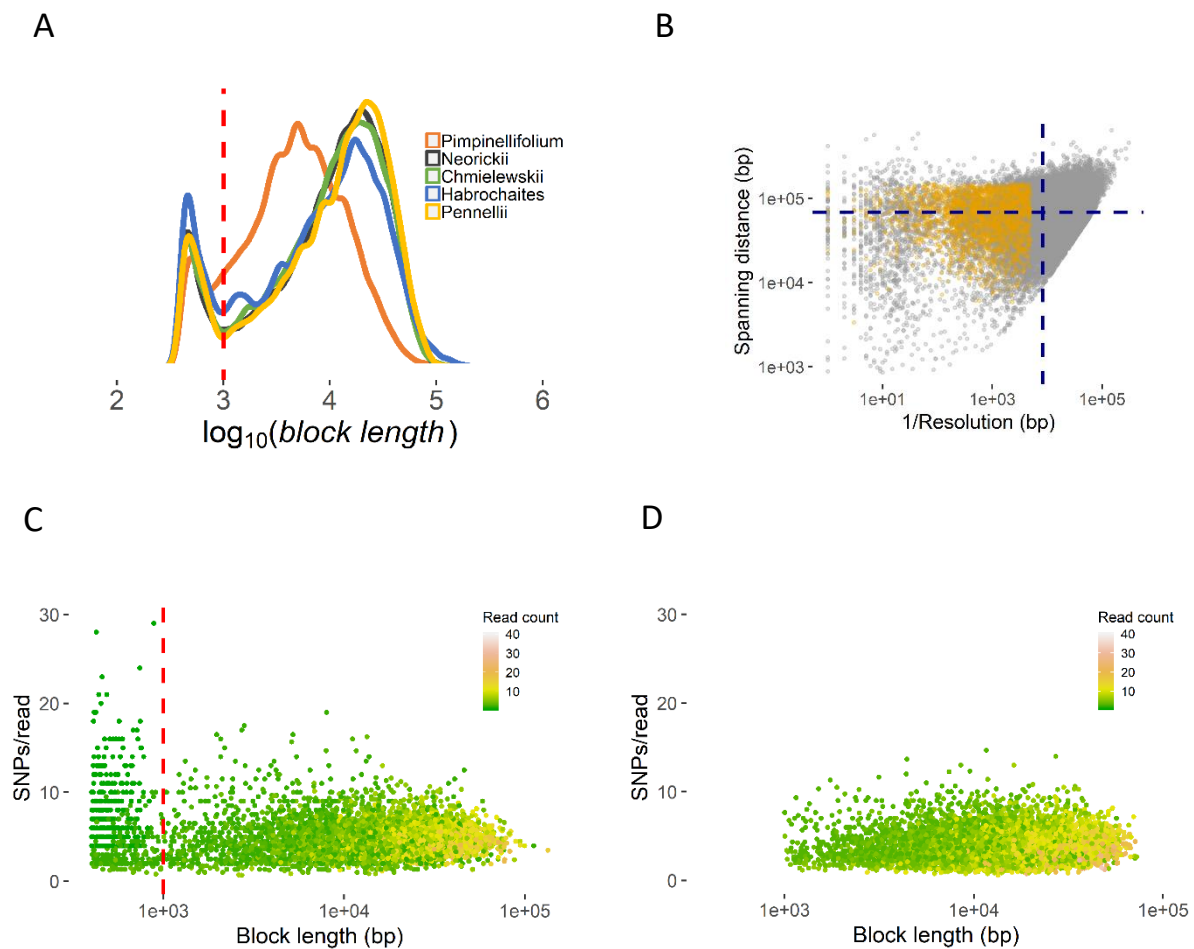

899 Supplementary Figure 3. **Frequency of crossovers per chromosome.**

900

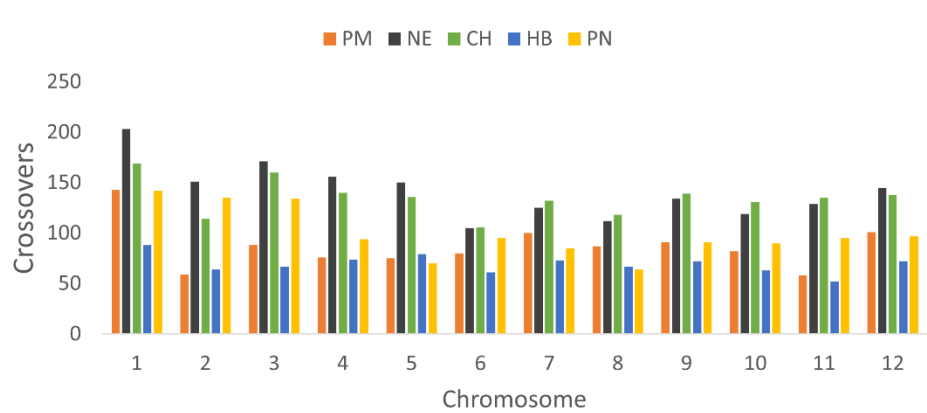

901

902 Supplementary Figure 4. **Crossover resolution and gene overlap.** A) *S. pimpinellifolium* crossovers  
903 have lower resolution compared to the other groups, but between the resolution of 0.0002 to 0.001  
904 (1kb to 5kb), the distributions are similar across the different crosses. B) Overlap of crossovers  
905 (resolution between 0.0002 to 0.001) with gene and intergenic regions.

906

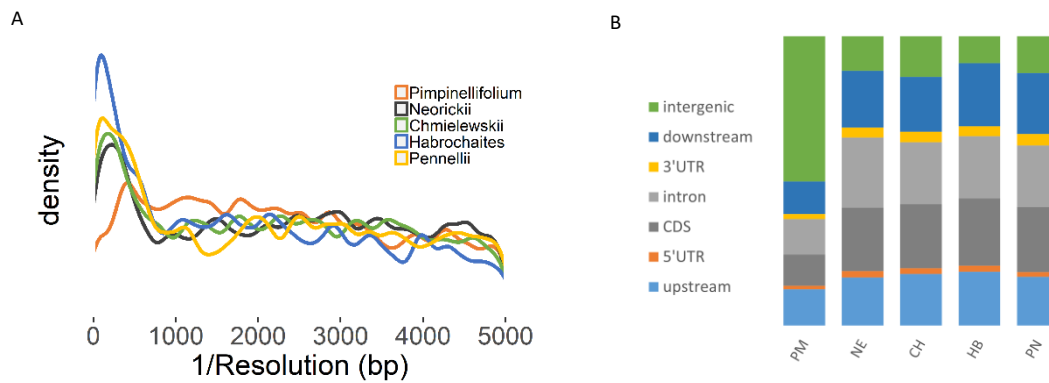



907 Supplementary Figure 5. **Overrepresented motifs.** A) Motifs found within and flanking CO regions.  
908 Of 1,267 COs with resolution of at least 0.002, only 8-28% have the motif within the CO regions  
909 while the rest contain multiple copies of the motifs in the flanking regions. B) Distribution of the  
910 motifs within and around high-resolution COs.

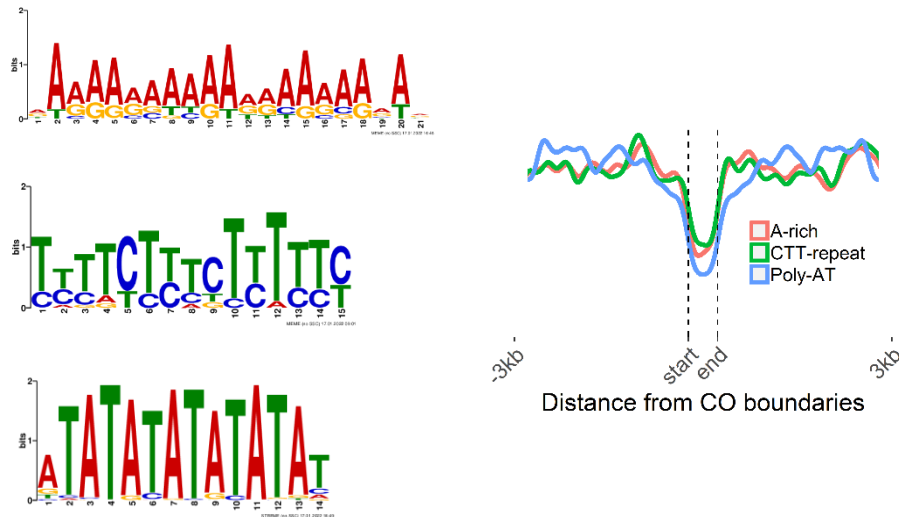

911

912

913 Supplementary Figure 6. **Longer structural variants for more distant wild genomes.** Distribution of  
914 SV sizes per population showing higher frequency of longer SVs for *S. habrochaites* and *S. pennellii*.

915

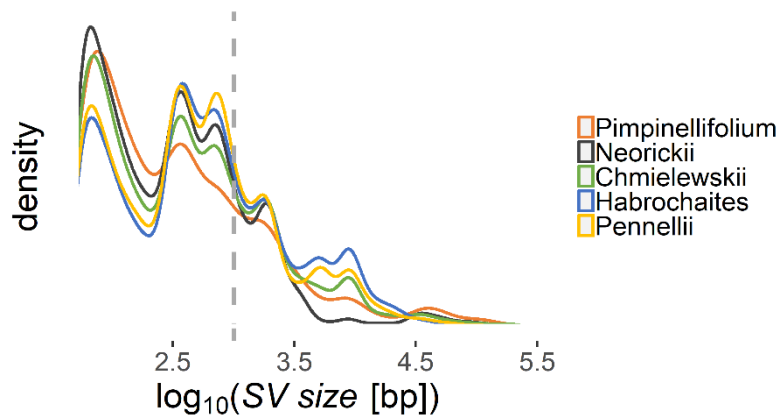

916 Supplementary Figure 7. **Validation of structural variants.** Examples of a (A) deletion and an (B)  
917 inversion that are validated by manual inspection. First, through dot plots between the assemblies of  
918 *S. lycopersicum* c.v. Heinz 1706 and *S. pennellii* genomes generated using *Gepard* (left). Second,  
919 through heatmap of overlapping barcodes between linked reads (10X Genomics) in the *S. pennellii*  
920 parental genome generated using *Loupe Browser*. The patterns in the top right and bottom right  
921 figures characterize a deletion and an inversion, respectively.  
922

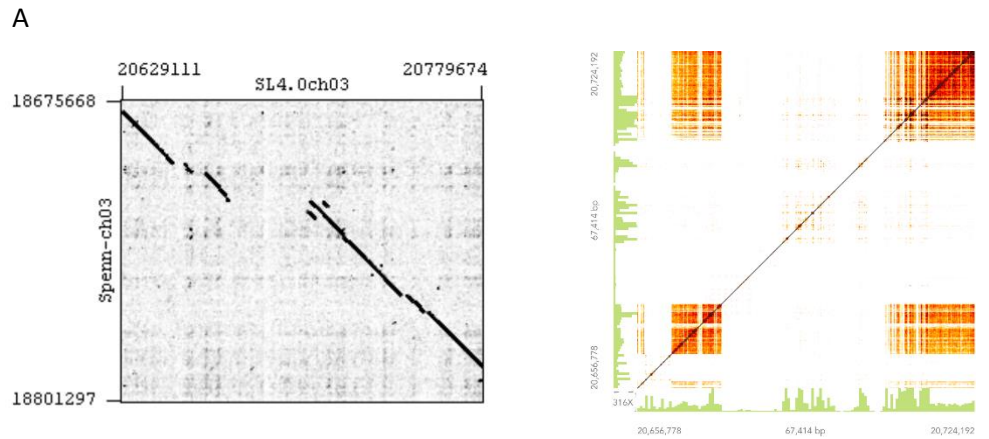

923

924

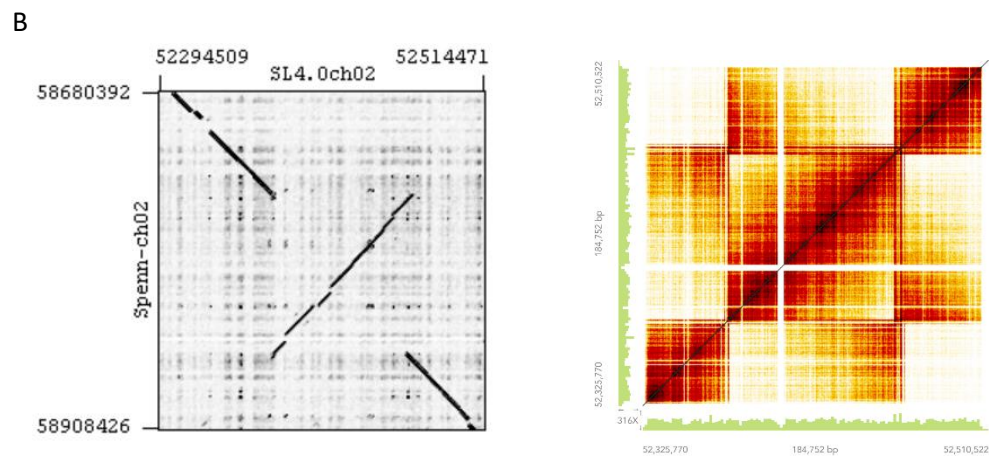

925 Supplementary Figure 8. **Parental genome alignment.** Alignment between the assemblies of *S.*  
926 *lycopersicum* and *S. pennellii* showing syntenic regions and rearrangements.  
927

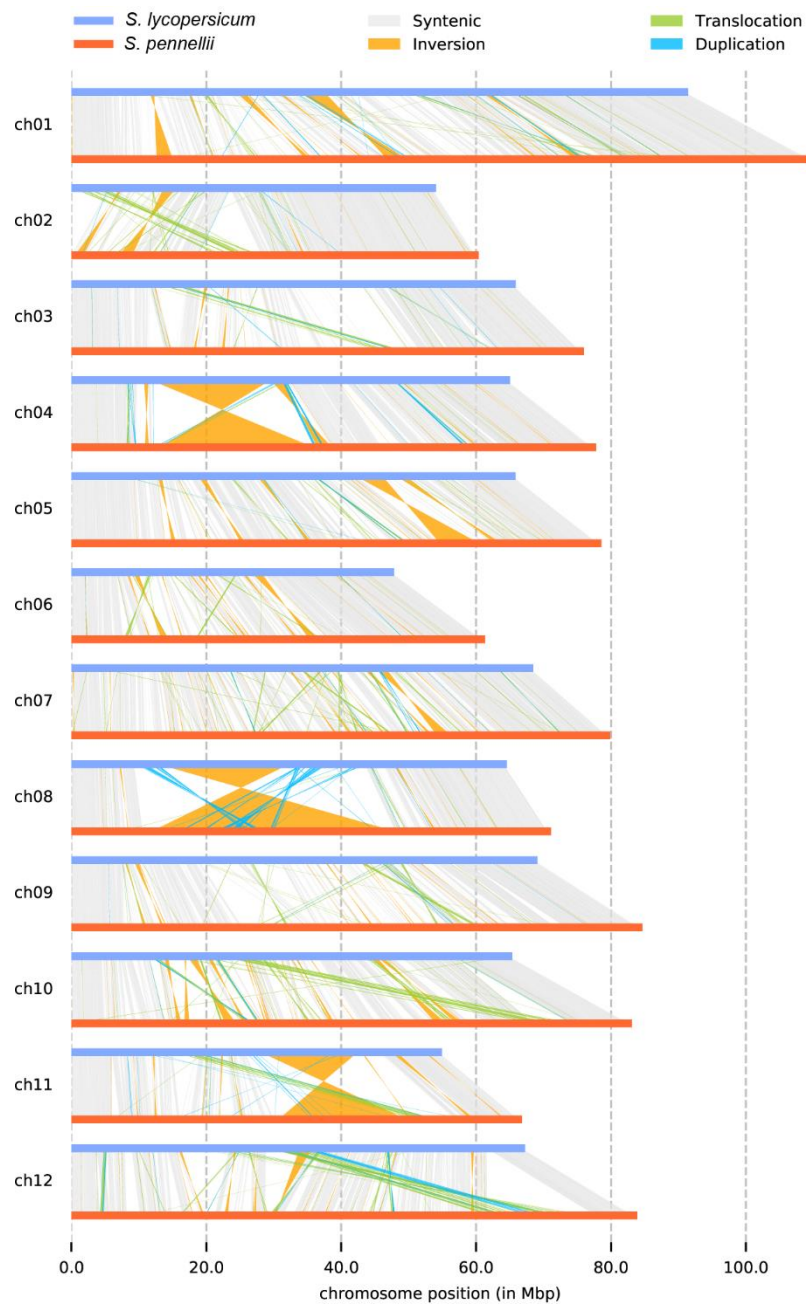

928 Supplementary Figure 9. **Suppression of COs relative to the size of SVs.** To determine the relation  
929 between SV size and CO suppression, SVs are first binned according to size. Afterwards, per bin, the  
930 overlap of SVs and COs in the observed data was compared against the overlap in 10,000  
931 permutation sets. Only bin [1kb,5kb] and [5kb,] have significantly fewer COs in SVs than expected by  
932 chance for all populations.  
933

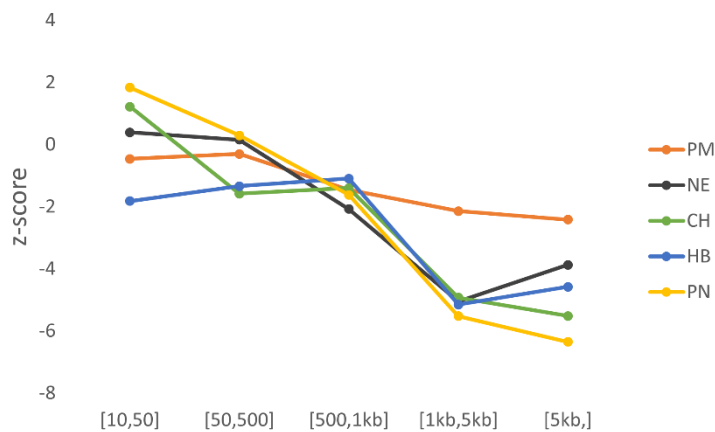

934  
935 Supplementary Figure 10. **Distance of SVs to COs by size.** There is no association between SV size  
936 and the distance of the nearest CO.  
937

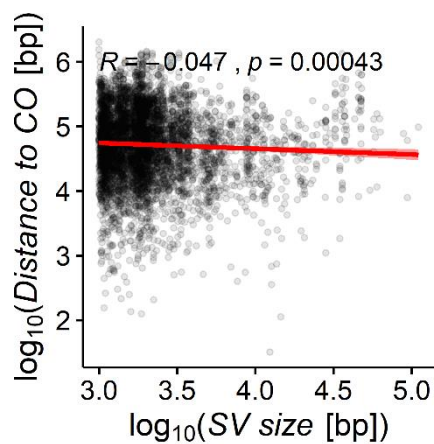

938 Supplementary Figure 11. **Sizes of SVs.** Pericentric heterochromatin contains longer SVs in most wild  
939 genomes.  
940

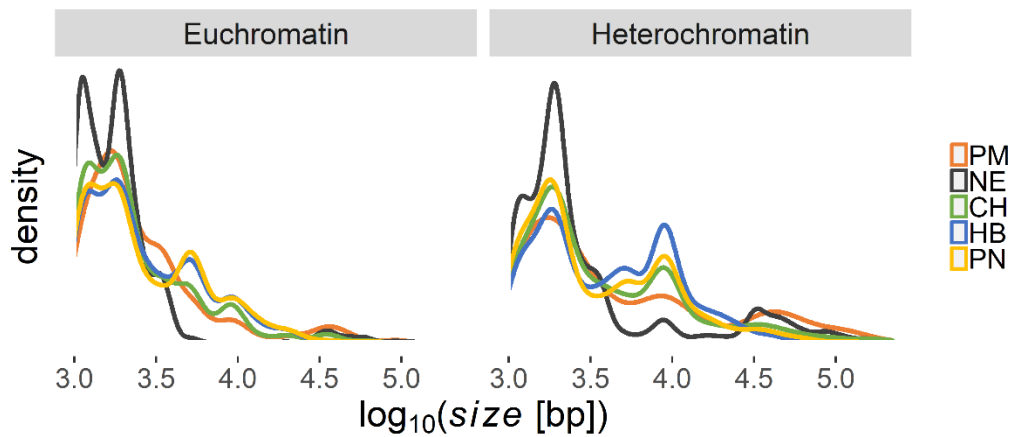

950  
951 Supplementary Figure 12. **Inversion in chromosome 7 short arm.** A) A distal inversion between the  
952 short arm of *S. lycopersicum* c.v. Heinz 1706 and the *S.pennellii* assembly was visualized using a dot plot.  
953 dot plot. B) Heatmap of overlapping barcodes between linked reads (10X Genomics) in the inversion  
954 region of *S. pennellii*. The figure was generated using *Loupe Browser*.  
955

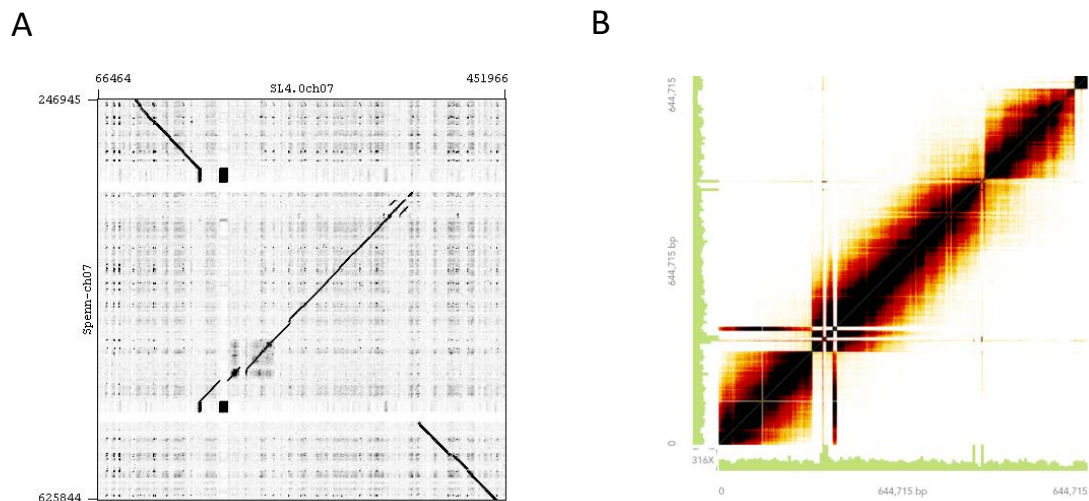

956 Supplementary Figure 13. **TE and CO correlation.** Spearman's rank correlation of crossover count  
957 and DNA transposons (*Stowaway* and *Tip100*) coverage in a sliding genome window. Each dot  
958 indicates a window.  
959

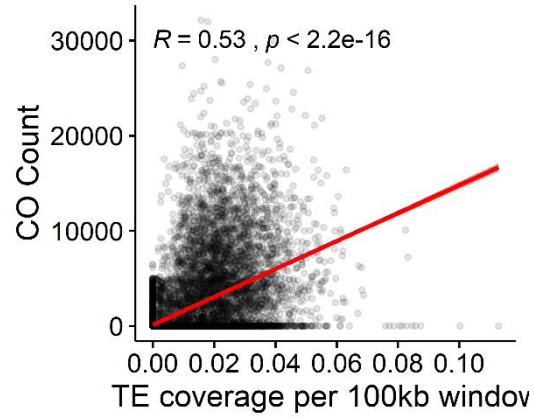



960 Supplementary Figure 14. **Pearson correlation of ACRs.** Comparison of read distribution over the  
961 genome between tissues and between biological replicates.  
962

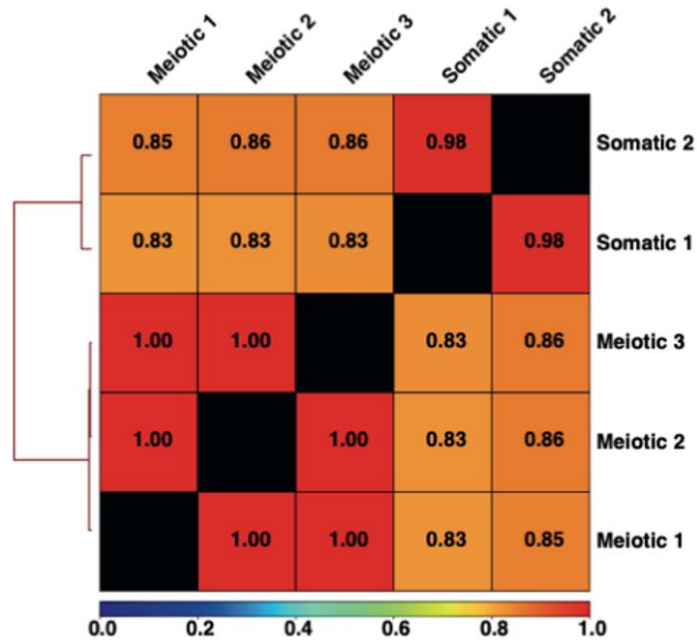

963 Supplementary Figure 15. **ATAC-seq peaks at transcription start sites (TSS)**. Read density across  
964 ATAC-seq peaks at TSS and their 3kb flanking regions. Each row of the heatmap represents one gene.  
965 Coverage is normalized in RPKM.

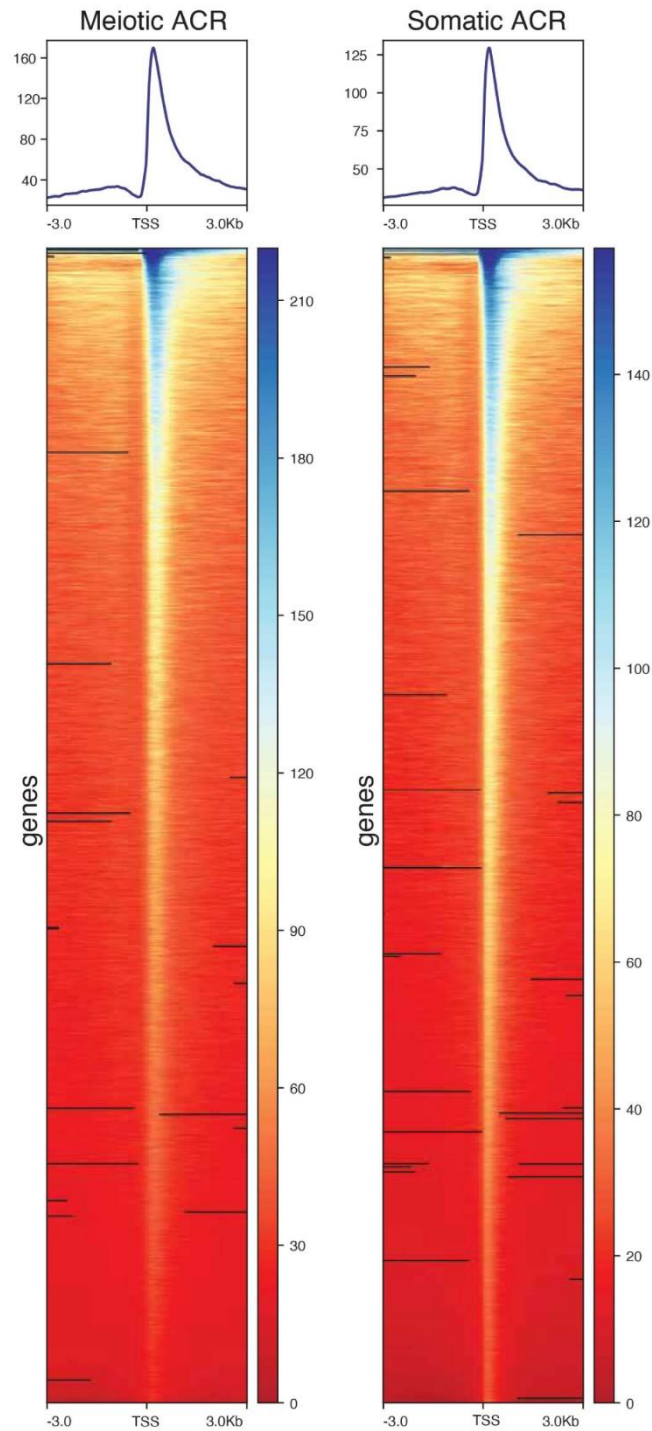

966 Supplementary Figure 16. **Functional enrichment in coldspot and CO regions.** The minimum fold  
967 enrichment is 1.5. We separately reported the overrepresented terms by category: biological  
968 process (A), cellular location (B) and molecular function (C).

969

970 A

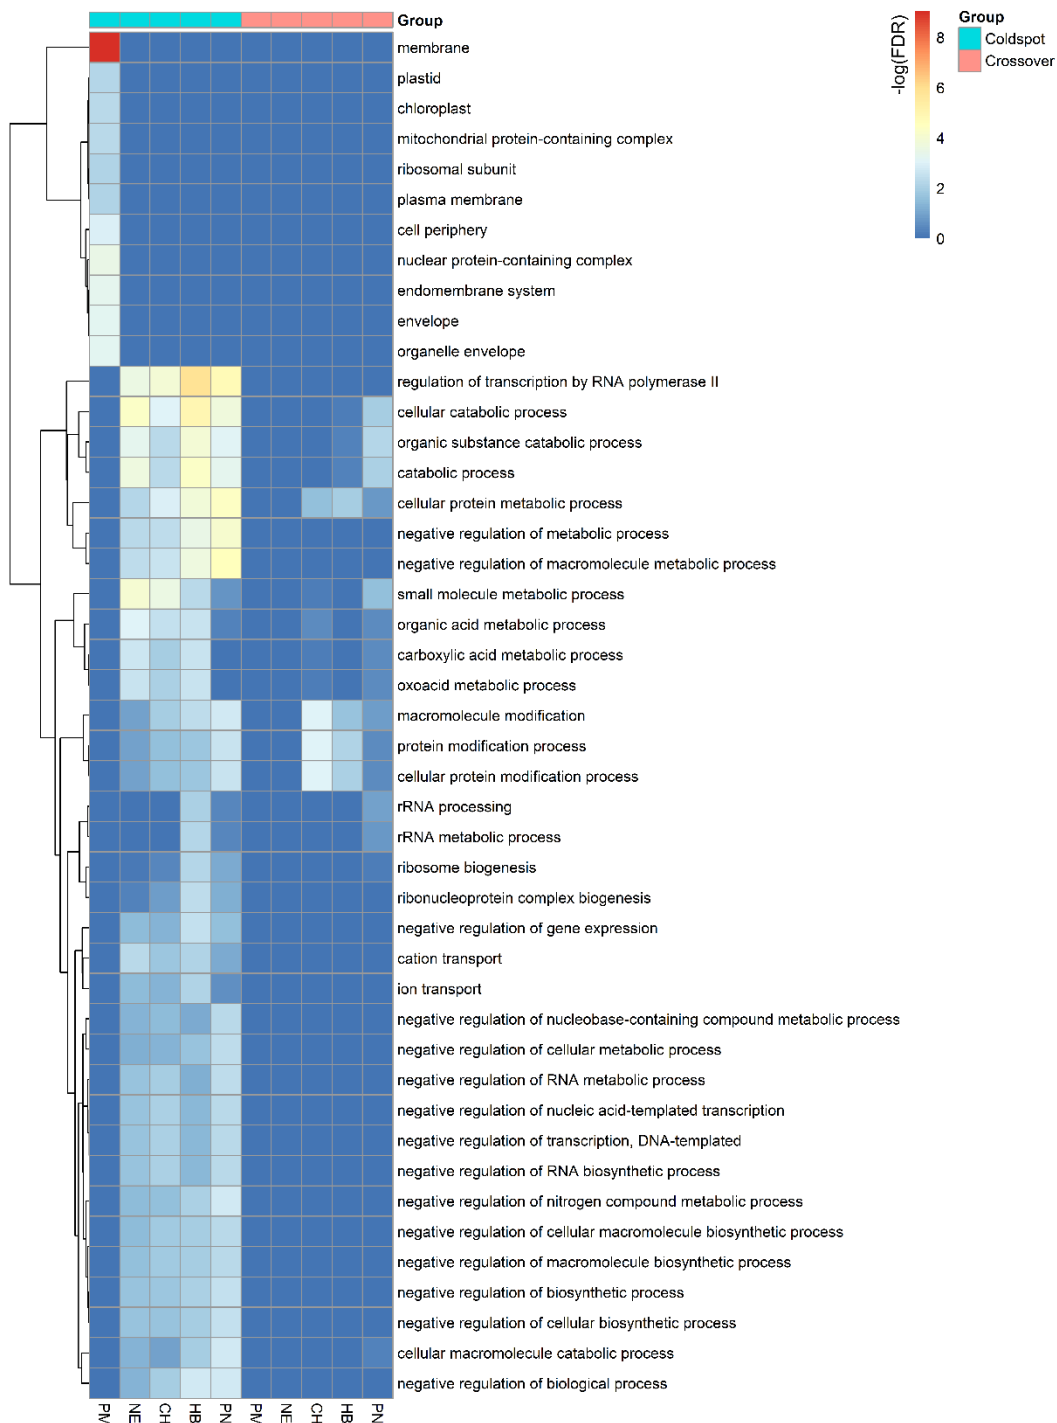

971

B

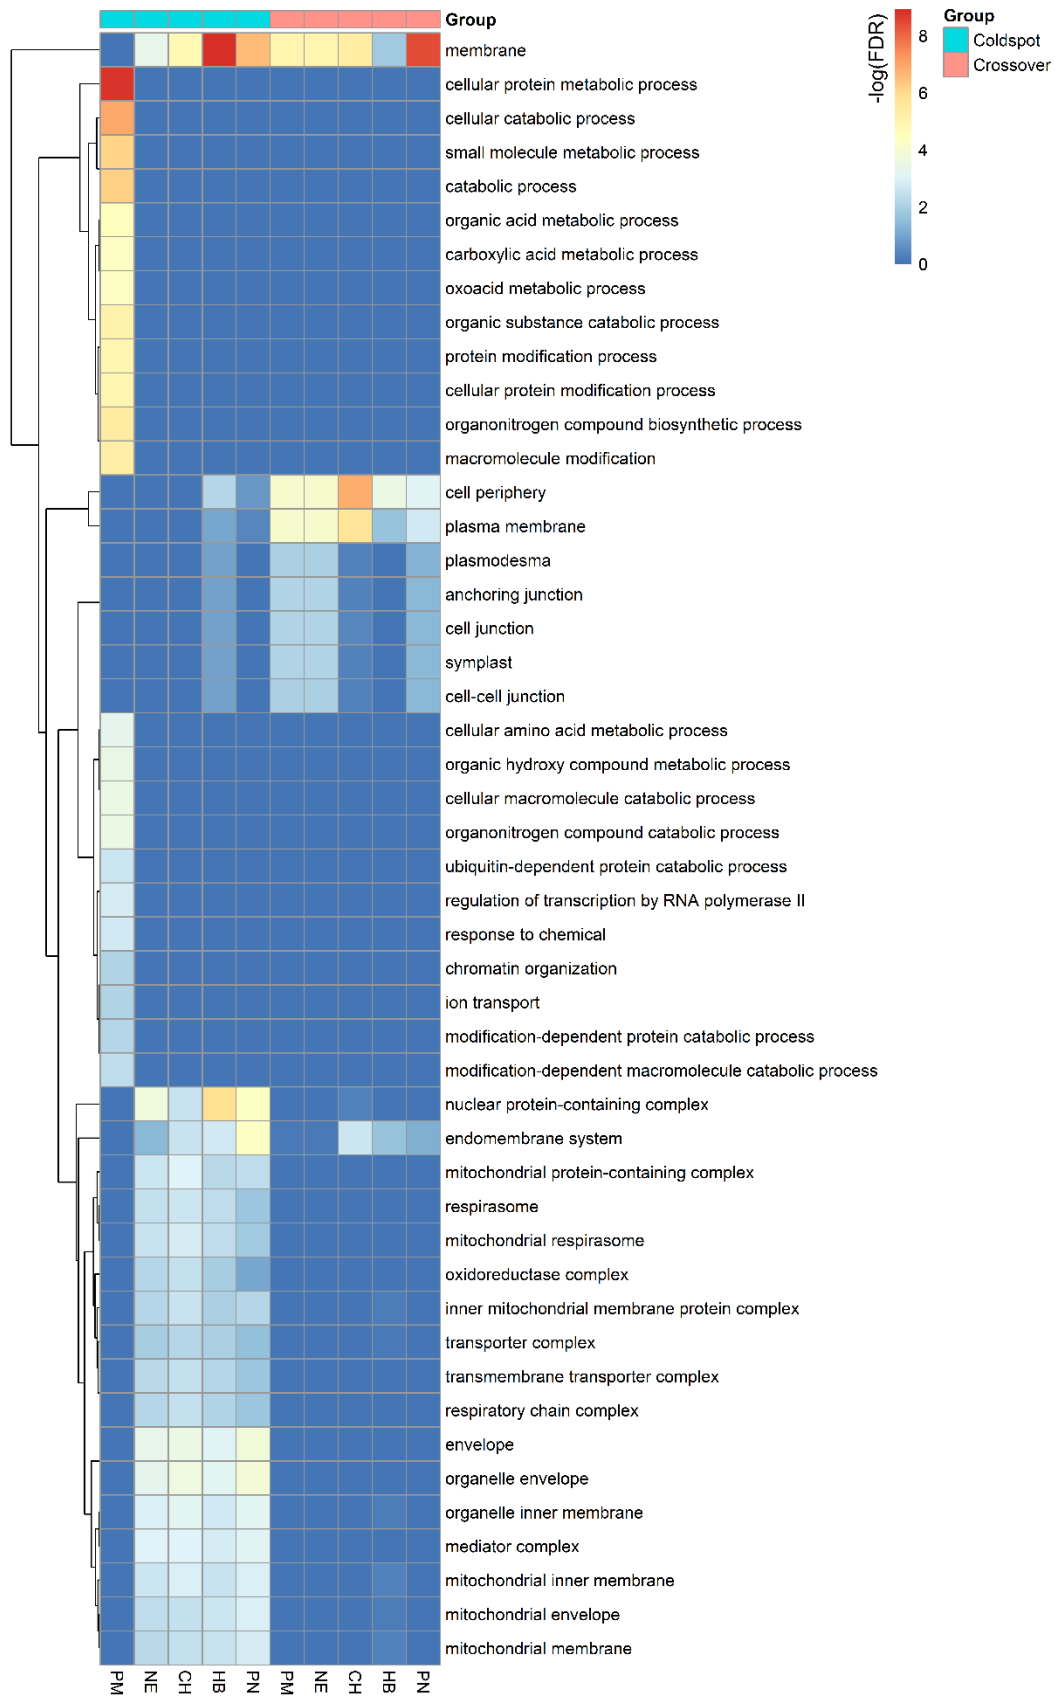

972

C

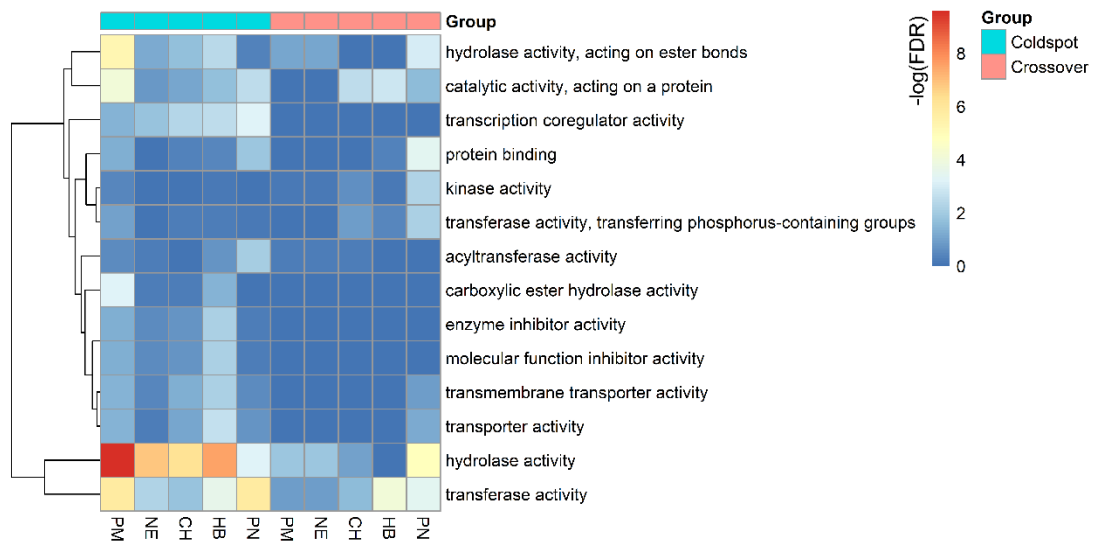

973

974 Supplementary Figure 17. **Resistance genes across the tomato genome.** The black dots representing  
975 the frequency of R genes is plotted with the recombination landscape of the *S. lycopersicum* x *S.*  
976 *pennellii* hybrid

977

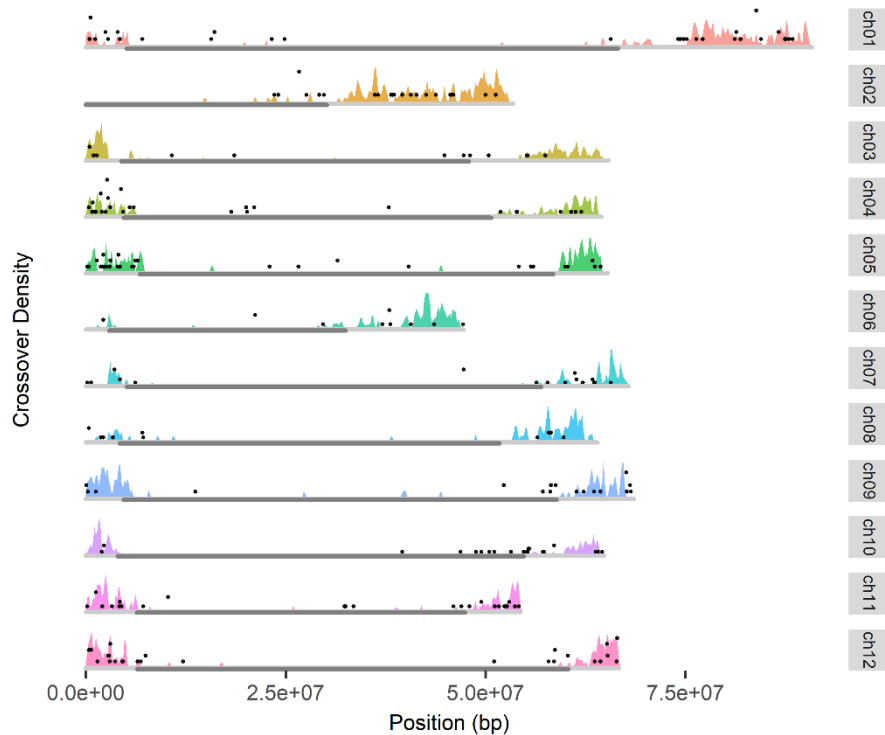

Source: https://www.biorxiv.org/content/biorxiv/early/2022/07/03/2022.07.02.498571.full.pdf
